# Supplementary material for: TAK1 deficiency promotes liver injury and tumorigenesis via ferroptosis and macrophage cGAS-STING signalling
Source: PubMed Central journal article supplement — JHEP Rep. 2023 Feb 3;5(5):100695. doi: 10.1016/j.jhepr.2023.100695 (PMC10033999; doi:10.1016/j.jhepr.2023.100695), 2023-02-03
Supplement: mmc1.pdf [file mmc1.pdf]

# **TAK1 deficiency promotes liver injury and tumorigenesis via ferroptosis and macrophage cGAS-STING signalling**

Wantong Su, Weicheng Gao, Rui Zhang, Qi Wang, Lei Li, Qingfa Bu, Zibo Xu, Zheng Liu, Mingming Wang, Yaqing Zhu, Guoping Wu, Haoming Zhou, Xun Wang, Ling Lu

## Table of contents

|                                          |    |
|------------------------------------------|----|
| Supplementary materials and methods..... | 2  |
| Fig. S1.....                             | 3  |
| Fig. S2.....                             | 4  |
| Fig. S3.....                             | 5  |
| Fig. S4.....                             | 6  |
| Fig. S5.....                             | 7  |
| Fig. S6.....                             | 8  |
| Fig. S7.....                             | 9  |
| Table S1.....                            | 10 |
| Table S2.....                            | 11 |
| Table S3.....                            | 12 |
| Table S4.....                            | 30 |
| Supplementary reference.....             | 32 |

## **Supplementary materials and methods**

### **Animal treatment**

Mice were maintained on either an iron-rich diet containing 2% carbonyl iron (Harlan, 2018S) or a standard diet starting at 3 weeks of age. Serum and liver samples were collected at 8 weeks of age.

### **Cell Isolation and Treatment**

Primary mouse HSCs were isolated according to the previous study[1]. In brief, livers were perfused in situ via the portal vein with 50 ml warmed (37 °C) Hanks' balanced salt solution (Ca<sup>2+</sup> and Mg<sup>2+</sup> free) containing EGTA (0.5 M), followed by collagenase IV (Sigma, Saint Louis, MO, USA, 0.05% w/v, dissolved in HBSS with Ca<sup>2+</sup> and Mg<sup>2+</sup>). Perfused livers were dissected and teased through 70-mm nylon mesh cell strainers and centrifuged at 50 g for 3 min. The supernatant was further centrifuged at 500 g for 10 min, resuspended in Ficoll plus Percoll (1:10, GE Healthcare), and centrifuged at 1400 g for 17 min. HSCs were collected from the interface. Primary mouse HSCs were incubated with primary macrophage conditioned media (CM) for 24h.

### **Macrophage Polarization**

To study the effects of STING inhibitors on macrophage polarization, primary liver macrophages were pretreated for 1 hour with C-176 (0.5 μM) or vehicle and then co-cultured with primary hepatocytes for 6 hours. Primary macrophages were collected for Western blot analysis and RT-qPCR.

### **Cell Viability Assay**

Primary hepatocytes were cultured in 96-well plate, cell viability was determined using a Cell Counting Kit-8 (CCK-8) (cat# CK04, Dojindo, Japan) assay according with the manufacturer's instructions. Cells in each well were incubated with 10 μl of CCK-8 reagent. Absorbance was measured at 450 nm at different time point.

### **LDH Release Assay**

LDH concentration of culture media was measured using the LDH Cytotoxicity Assay Kit following according with the manufacturer's instructions (cat# C0016, Beyotime, China).

Fig.S1

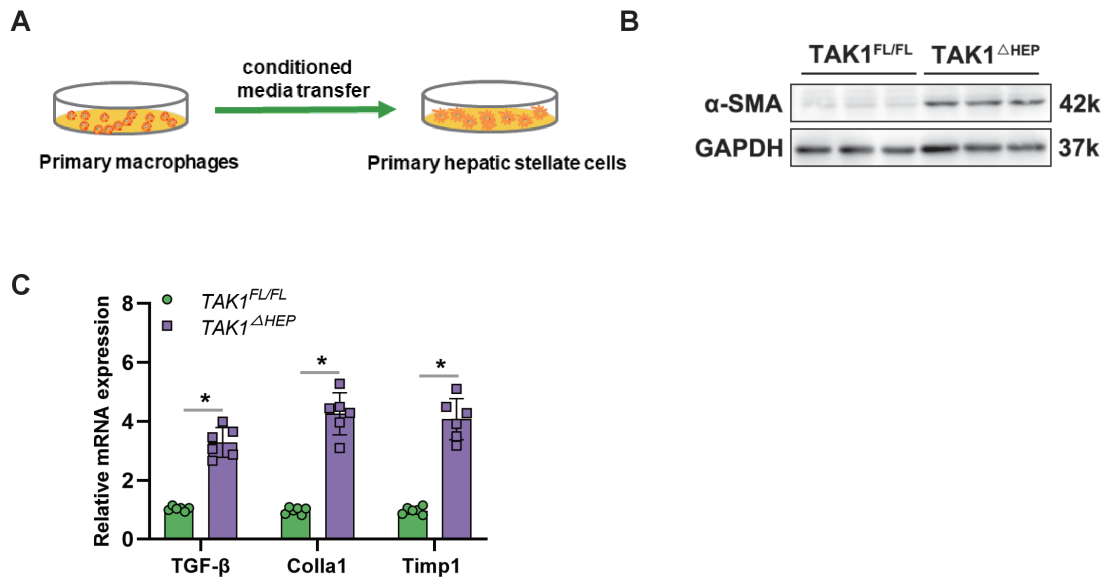

**Fig.S1 Macrophages from TAK1<sup>ΔHEP</sup> mice liver contributed hepatic stellate cells' activation**

(A) Conditioned media of primary liver macrophage from TAK1<sup>FL/FL</sup> and TAK1<sup>ΔHEP</sup> mice was transferred to primary hepatic stellate cells of wildtype mice for 24 hours in the presence of TGF-β1 (8 ng/mL). (B) α-SMA protein expression of primary HSCs. (C) The mRNA levels of TGF-β, Colla1, and Timp1 of primary HSCs. Data are presented as the mean ± SEM (n = 6). \**p* < 0.05 Mann–Whitney U test.

**Fig. S2**

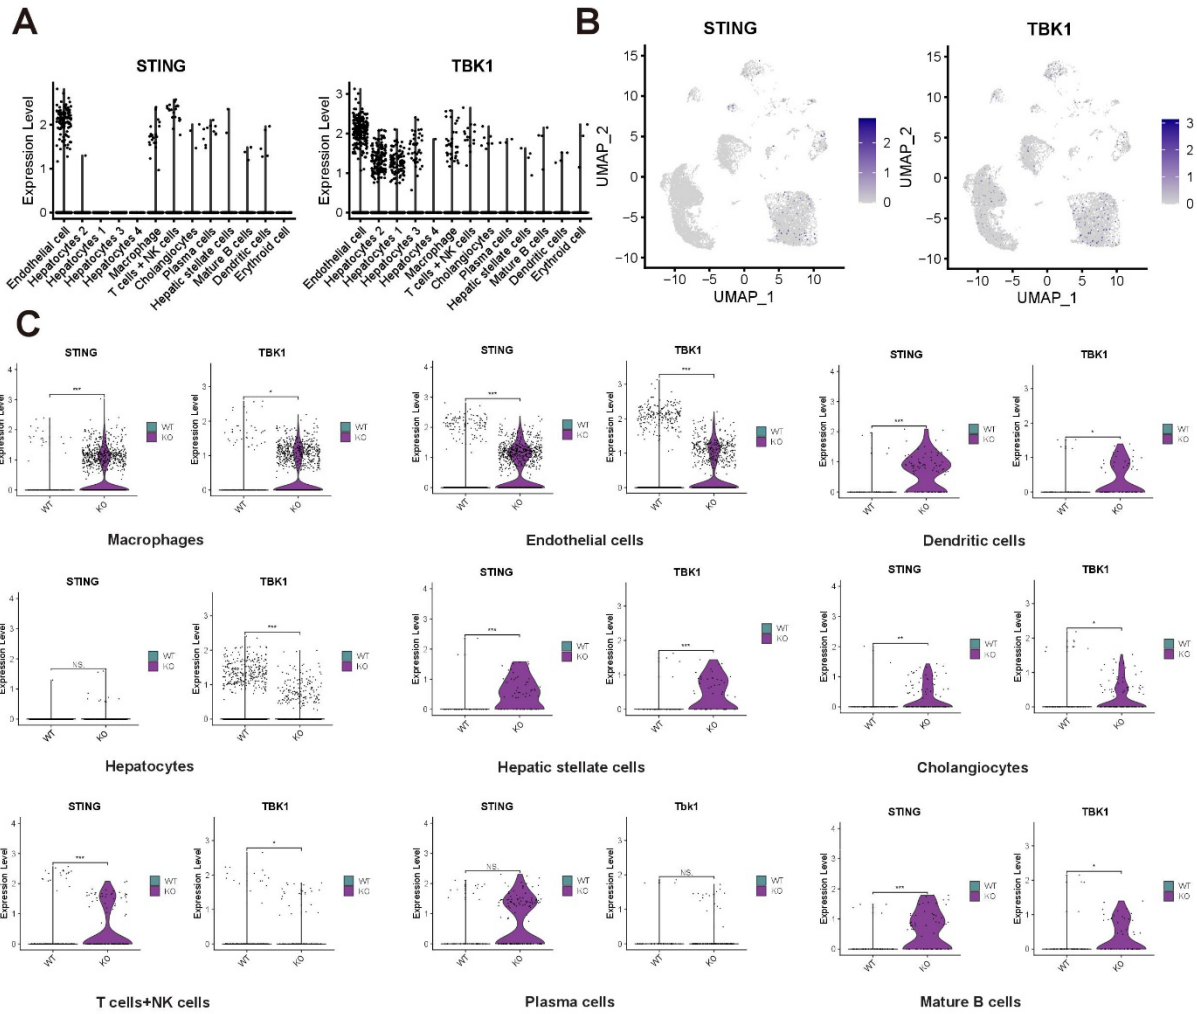

**Fig. S2. STING signaling pathway related genes expression**

Gene expression of all clusters were constructed using the Seurat VlnPlot & Featureplot function. Violin plots (A) and Featureplot (B) show STING and TBK1 expression across all clusters of  $TAK1^{FL/FL}$  mice. (C) Violin plots of STING and TBK1 expression in macrophages of  $TAK1^{FL/FL}$  and  $TAK1^{\Delta HEP}$  mice. ns, not significant; \*  $p < 0.05$ , \*\*  $p < 0.01$ , \*\*\*\*  $p < 0.001$ , Wilcoxon rank sum test. WT:  $TAK1^{FL/FL}$ , KO:  $TAK1^{\Delta HEP}$

**Fig. S3**

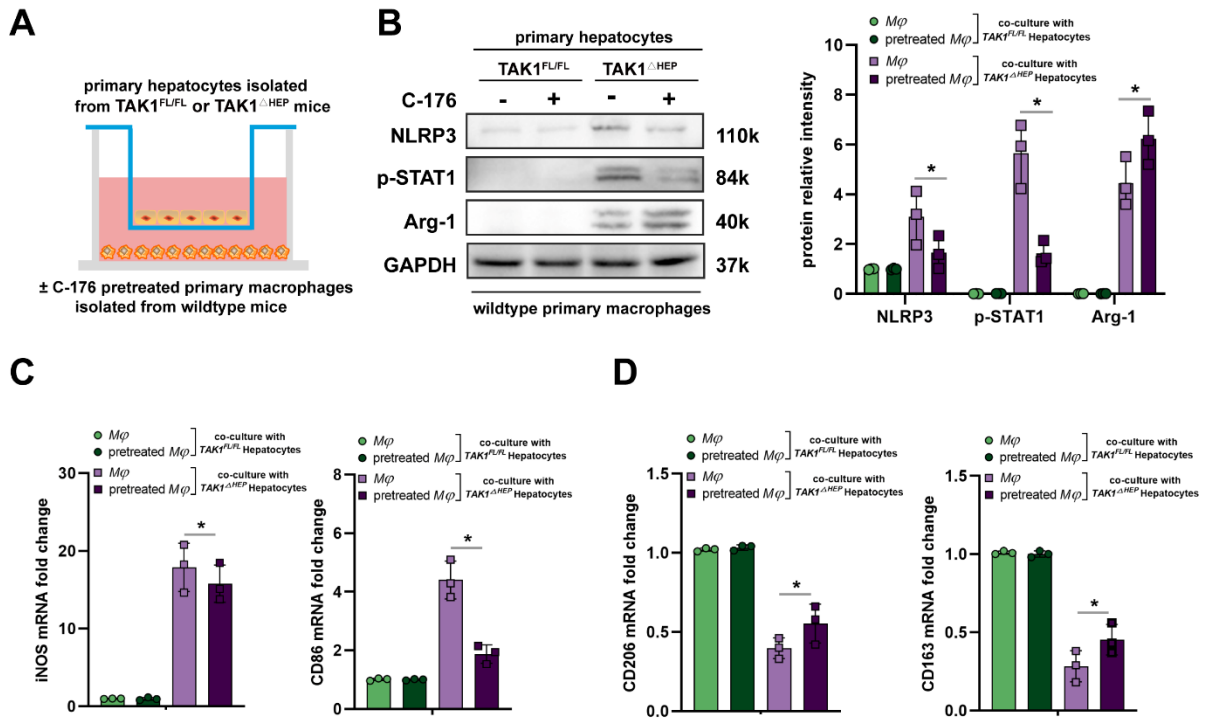

**Fig. S3. C-176 impact on primary macrophage polarization.**

(A) After pretreatment for 1 h with C-176 (0.5  $\mu$ M) or vehicle, primary liver macrophages of wild-type mice were co-cultured with TAK1<sup>FL/FL</sup> and TAK1<sup>ΔHEP</sup> primary hepatocytes for 6 h, Primary macrophages were harvested for western blots for (B) NLRP3, p-STAT1 and Arg-1, and (C, D) RT-qPCR analysis for iNOS, CD86, CD206 and CD163. Data are presented as the mean  $\pm$  SEM (n = 3). \*  $p < 0.05$  Mann-Whitney U test. M $\phi$ : primary liver macrophage

**Fig. S4**

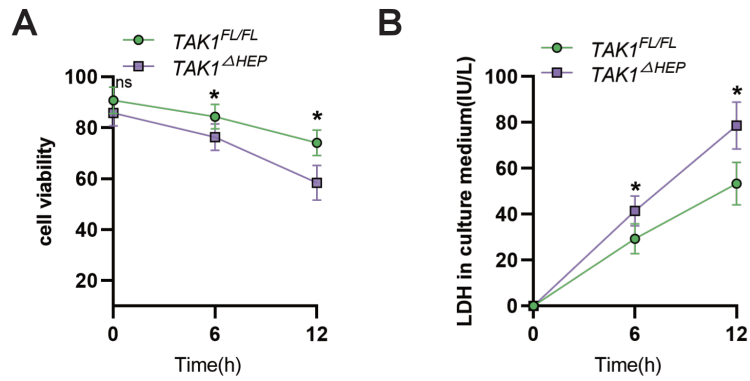

**Fig.S4 Primary hepatocytes viability decreased after TAK1 deficiency.**

**(A)** Cell viability of primary hepatocytes from  $TAK1^{FL/FL}$  and  $TAK1^{\Delta HEP}$  mice. **(B)** LDH level of culture media from primary hepatocytes. Data are presented as the mean  $\pm$  SEM (n = 6). ns, not significant, \* $p < 0.05$  Mann–Whitney U test.

**Fig.S5**

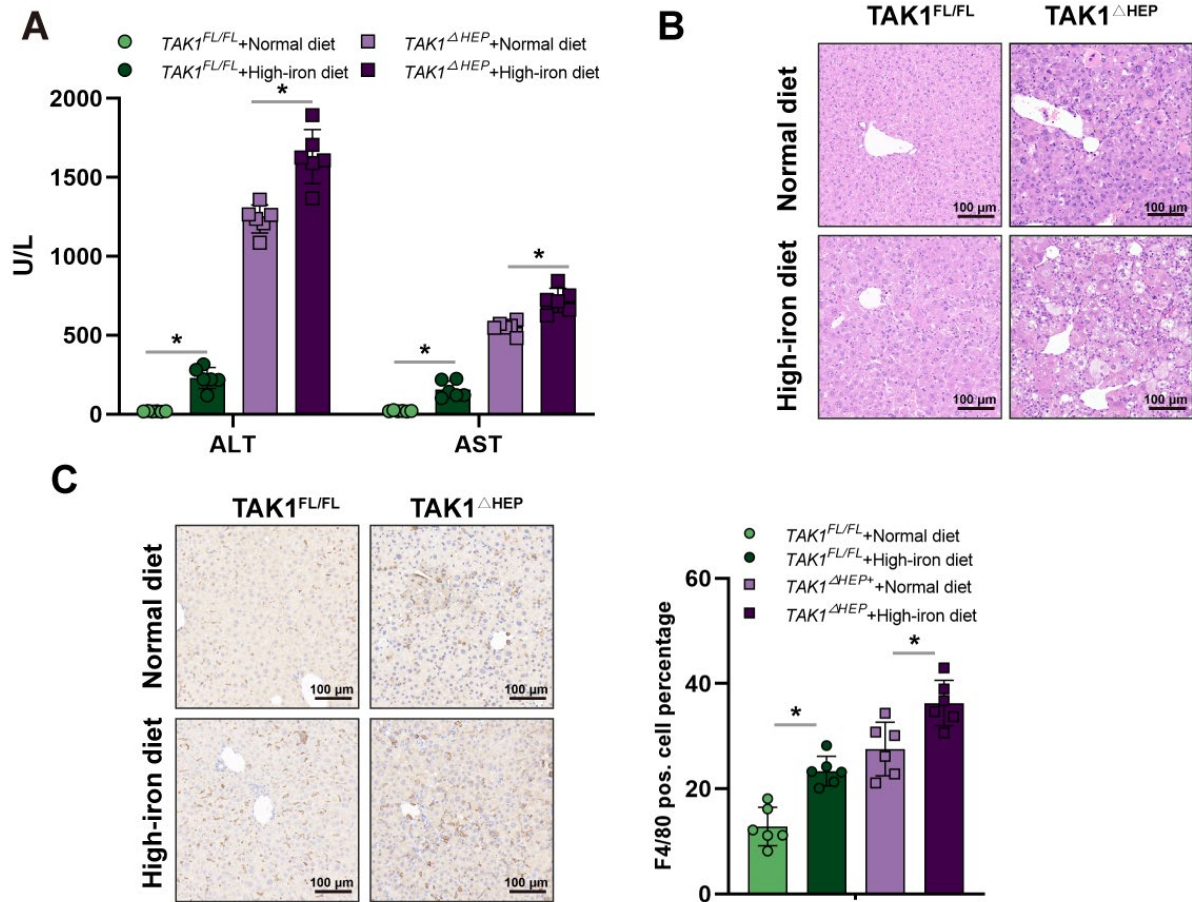

**Fig.S5 High-iron diet increased liver injury and inflammation of TAK1 deficiency mice**

(A) Serum ALT and AST levels of  $TAK1^{FL/FL}$  and  $TAK1^{\Delta HEP}$  mice fed with control or iron-rich diet; Data are presented as the mean  $\pm$  SEM (n = 6). \* $p < 0.05$  Mann–Whitney U test. (B) H&E and (C) F4/80 staining were carried out on the liver tissues of 8 weeks old  $TAK1^{FL/FL}$  and  $TAK1^{\Delta HEP}$  mice treated with control or iron-rich diet.

**Fig. S6**

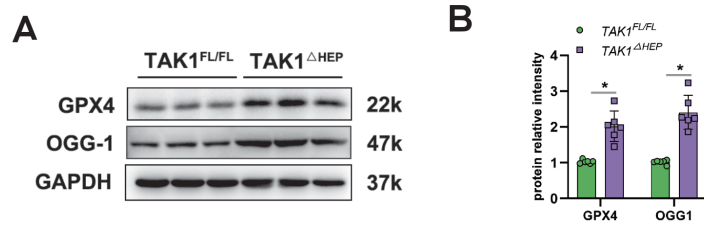

**Fig.S6 Compensatory antioxidant response in TAK1 deficiency mice.**

(A) Western blotting of GPX4 and OGG1 protein of TAK1<sup>FL/FL</sup> and TAK1<sup>ΔHEP</sup> mice liver.

(B) Quantification of GPX4 and OGG1 expression. Data are presented as the mean ± SEM (n = 6). \* $p < 0.05$  Mann–Whitney U test.



Fig. S7

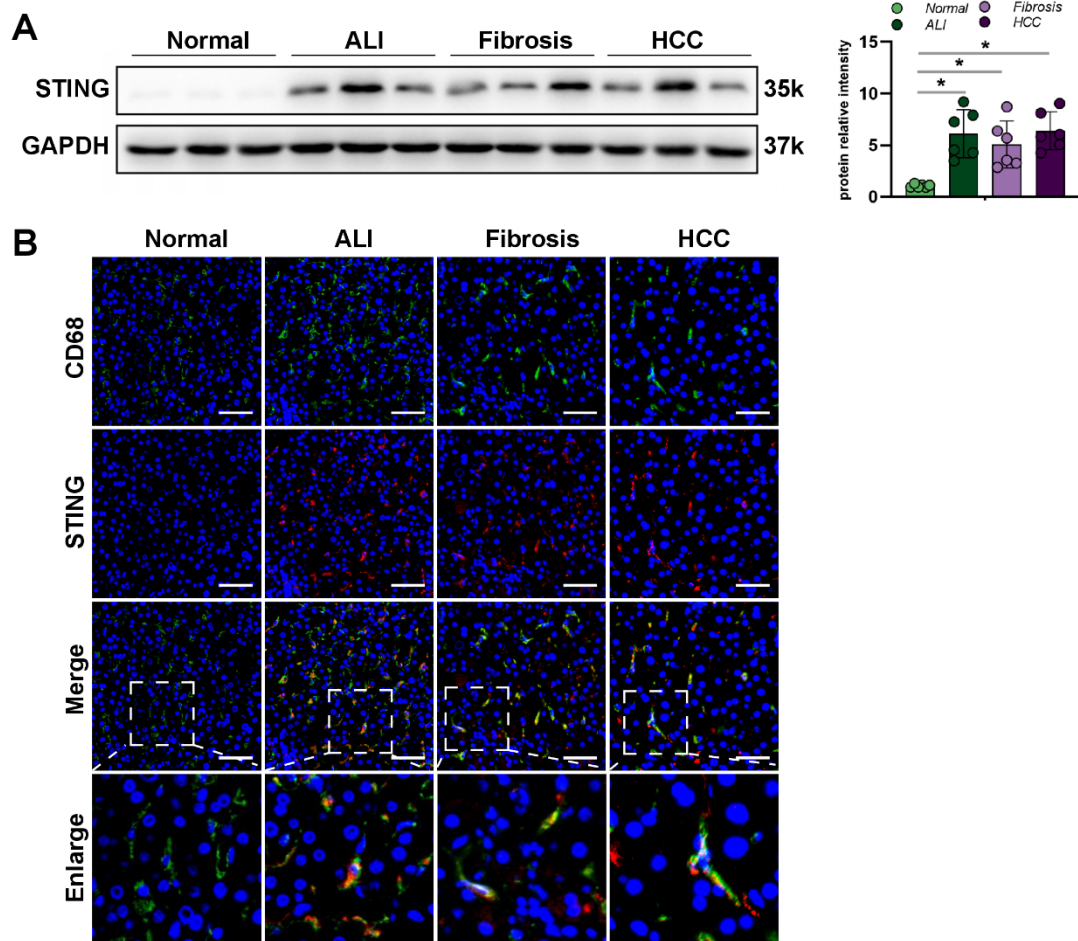

**Fig. S7. Macrophage STING expression in patients with ALI, fibrosis, and HCC**

Liver tissues were collected from different patients as described in Materials and Methods.

(A) Western blot analysis of STING expression; Data are presented as the mean  $\pm$  SEM (n = 6). \*  $p < 0.05$  Mann–Whitney U test. (B) Representative IF images of CD68 and STING staining (200 $\times$  magnification, scale bars=100  $\mu$ m).

**Table S1: Sequence of primers used for RT-PCR studies**

| Gene           | Forward Primer (5'-3')   | Reverse Primer (5'-3')  |
|----------------|--------------------------|-------------------------|
| GAPDH          | AGGTCGGTGTGAACGGATTTG    | TGTAGACCATGTAGTTGAGGTCA |
| CD86           | GGTGGCCTTTTTGACACTCTC    | TGAGGTAGAGGTAGGAGGATCTT |
| iNOS           | GTTCTCAGCCCAACAATAACAAGA | GTGGACGGGTTCGATGTCAC    |
| CD163          | ATGGGTGGACACAGAATGGTT    | CAGGAGCGTTAGTGACAGCAG   |
| CD206          | CTCTGTTCACTATTGGACGC     | CGGAATTTCTGGGATTCAGCTTC |
| IFN $\beta$    | CCTGGAGCAGCTGAATGGAA     | TGGATGGCAAAGGCAGTGTA    |
| TNF- $\alpha$  | CCCTCACACTCAGATCATCTTCT  | GCTACGACGTGGGCTACAG     |
| IL-6           | TAGTCCTTCCTACCCCAATTTCC  | TTGGTCCTTAGCCACTCCTTC   |
| IL-1 $\beta$   | GCAACTGTTCTGAACTCAACT    | ATCTTTTGGGGTCCGTCAACT   |
| IL-10          | ACAGGGAAGAAATCGATGACA    | TGGGGGAGAACCTGAAGAC     |
| NF- $\kappa$ B | ATGGCAGACGATGATCCCTAC    | TGTTGACAGTGGTATTTCTGGTG |
| TIMP1          | AGGTGGTCTCGTTGATTTCT     | GTAAGGCCTGTAGCTGTGCC    |
| Col1a1         | TAGGCCATTGTGTATGCAGC     | ACATGTTCACTTTGTGGACC    |
| NRF2           | TCTTGGAGTAAGTCGAGAAGTGT  | GTTGAAACTGAGCGAAAAAGGC  |
| NQO1           | ATGGGAGGTGGTCGAATCTGA    | GCCTTCCTTATACGCCAGAGATG |
| GSTP1          | ATGCCACCATACACCATTGTC    | GGGAGCTGCCCATACAGAC     |
| GCLC           | GGGGTGACGAGGTGGAGT       | GTTGGGGTTTGTCTCTCCC     |

**Table S2 □ Information of Patients**

|                       | Normal      | ALI           | Fibrosis     | HCC           |
|-----------------------|-------------|---------------|--------------|---------------|
| Number of patients    | 6           | 6             | 6            | 6             |
| Age                   | 42.67±9.41  | 43.33±15.69   | 50.50±12.79  | 49.00±10.12   |
| Gender (male: female) | 2:1         | 1:2           | 2:1          | 1:2           |
| ALT(U/L)              | 25.21±11.31 | 556.94±178.59 | 141.57±56.12 | 275.27±99.08  |
| AST(U/L)              | 16.17±4.12  | 343.54±166.50 | 101.00±29.08 | 245.95±107.30 |
| Bilirubin(μmol/L)     | 13.88±5.70  | 204.60±45.40  | 28.63±7.73   | 288.17±109.99 |
| Treatment             | surgery     | biopsy        | biopsy       | biopsy        |

Data are presented as the mean ± SD

**Table S3 □ DEGs of TAK1<sup>ΔHEP</sup> hepatocyte cluster 7**

|           | p_value   | avg_log2FC  | pct.1 | pct.2 | p_value adjust |
|-----------|-----------|-------------|-------|-------|----------------|
| Prelp     | 0         | 0.797101031 | 0.284 | 0.006 | 0              |
| Slpi      | 0         | 1.858497355 | 0.537 | 0.025 | 0              |
| S100a11   | 0         | 0.958553873 | 0.456 | 0.026 | 0              |
| Osbpl3    | 0         | 0.845054691 | 0.353 | 0.01  | 0              |
| Mfge8     | 0         | 1.414348694 | 0.484 | 0.023 | 0              |
| Bicc1     | 0         | 0.790723677 | 0.378 | 0.015 | 0              |
| Cd63      | 0         | 1.53332165  | 0.625 | 0.058 | 0              |
| Ubd       | 0         | 1.060237398 | 0.431 | 0.011 | 0              |
| Sox4      | 1.14E-301 | 1.035860402 | 0.303 | 0.009 | 2.42E-297      |
| Cd14      | 4.83E-289 | 0.680249371 | 0.266 | 0.006 | 1.02E-284      |
| Cybb      | 3.20E-280 | 1.214518517 | 0.484 | 0.035 | 6.78E-276      |
| Tagln2    | 2.45E-274 | 1.325467013 | 0.55  | 0.049 | 5.20E-270      |
| Anxa2     | 4.22E-273 | 1.13882899  | 0.447 | 0.03  | 8.95E-269      |
| Spp1      | 9.49E-267 | 4.607928701 | 0.631 | 0.074 | 2.01E-262      |
| Spink1    | 1.43E-257 | 1.276282901 | 0.409 | 0.026 | 3.02E-253      |
| Nid1      | 6.70E-248 | 0.858957696 | 0.431 | 0.031 | 1.42E-243      |
| Lcn2      | 4.11E-246 | 2.797249993 | 0.794 | 0.136 | 8.71E-242      |
| Klf6      | 1.05E-244 | 1.019578201 | 0.481 | 0.041 | 2.22E-240      |
| Tes       | 5.78E-239 | 0.490005671 | 0.269 | 0.01  | 1.23E-234      |
| Serpina7  | 1.91E-235 | 1.800899659 | 0.469 | 0.042 | 4.04E-231      |
| Rad51b    | 6.50E-222 | 0.691143361 | 0.291 | 0.014 | 1.38E-217      |
| Ly6d      | 1.76E-216 | 2.179541245 | 0.588 | 0.075 | 3.73E-212      |
| Atp6v0c   | 5.48E-213 | 1.30405661  | 0.672 | 0.099 | 1.16E-208      |
| Casp12    | 9.11E-210 | 0.474411352 | 0.259 | 0.011 | 1.93E-205      |
| Tmsb10    | 8.99E-209 | 0.727422063 | 0.297 | 0.016 | 1.91E-204      |
| Serpina6b | 3.60E-204 | 0.73094084  | 0.331 | 0.021 | 7.64E-200      |
| Cd9       | 1.48E-203 | 1.459271378 | 0.609 | 0.088 | 3.13E-199      |
| Rragd     | 8.96E-202 | 0.426296742 | 0.266 | 0.013 | 1.90E-197      |
| Serpina6a | 2.91E-195 | 0.750945891 | 0.378 | 0.031 | 6.16E-191      |
| Slc25a4   | 4.06E-186 | 0.491608418 | 0.281 | 0.016 | 8.61E-182      |
| Atp5mpl   | 5.40E-185 | 1.229242638 | 0.744 | 0.128 | 1.15E-180      |
| Plscr1    | 3.27E-183 | 1.196865761 | 0.578 | 0.084 | 6.93E-179      |
| Tgm2      | 1.30E-180 | 1.245674815 | 0.659 | 0.111 | 2.75E-176      |
| Rhoc      | 2.56E-179 | 0.630814004 | 0.381 | 0.034 | 5.43E-175      |
| Ifi2712b  | 9.70E-178 | 0.693039057 | 0.381 | 0.035 | 2.06E-173      |
| Gipc2     | 6.96E-174 | 0.424083999 | 0.259 | 0.015 | 1.48E-169      |
| Rab5if    | 1.41E-173 | 1.044021398 | 0.637 | 0.103 | 2.99E-169      |
| Scd2      | 1.82E-171 | 1.139433487 | 0.472 | 0.056 | 3.85E-167      |
| Spon2     | 1.28E-170 | 0.56807136  | 0.35  | 0.03  | 2.71E-166      |
| Tnfrsf12a | 1.89E-164 | 0.499537279 | 0.297 | 0.022 | 4.00E-160      |

|            |           |             |       |       |           |
|------------|-----------|-------------|-------|-------|-----------|
| Anxa5      | 1.03E-162 | 2.087655464 | 0.784 | 0.204 | 2.19E-158 |
| Elf3       | 1.93E-160 | 0.471903165 | 0.259 | 0.017 | 4.10E-156 |
| Resf1      | 6.36E-159 | 0.544729926 | 0.319 | 0.027 | 1.35E-154 |
| Tut4       | 2.41E-154 | 0.488101504 | 0.306 | 0.025 | 5.10E-150 |
| Cystm1     | 1.60E-153 | 0.867547233 | 0.541 | 0.084 | 3.40E-149 |
| Tax1bp3    | 1.61E-150 | 0.520600174 | 0.353 | 0.035 | 3.42E-146 |
| Tut7       | 1.05E-148 | 0.625310571 | 0.431 | 0.054 | 2.23E-144 |
| Stmn1      | 5.12E-146 | 0.89976965  | 0.347 | 0.036 | 1.08E-141 |
| Gm30692    | 8.19E-144 | 0.501659851 | 0.259 | 0.019 | 1.74E-139 |
| AC102496.1 | 1.11E-142 | 0.427597977 | 0.297 | 0.026 | 2.36E-138 |
| Itih5      | 2.69E-139 | 0.658668251 | 0.441 | 0.059 | 5.70E-135 |
| Slc39a4    | 3.35E-139 | 0.75034716  | 0.484 | 0.072 | 7.09E-135 |
| Cstb       | 4.65E-137 | 1.712247762 | 0.734 | 0.199 | 9.86E-133 |
| Lpl        | 1.20E-133 | 1.087807865 | 0.613 | 0.119 | 2.55E-129 |
| Saa2       | 3.35E-132 | 2.819774034 | 0.628 | 0.133 | 7.11E-128 |
| Sirpa      | 1.95E-131 | 0.395801546 | 0.272 | 0.023 | 4.13E-127 |
| Cib3       | 1.49E-125 | 0.969489219 | 0.491 | 0.083 | 3.15E-121 |
| Lgals1     | 2.79E-125 | 0.780574267 | 0.409 | 0.058 | 5.92E-121 |
| Ciao2a     | 3.96E-125 | 0.635795775 | 0.434 | 0.064 | 8.39E-121 |
| Orm2       | 5.08E-125 | 2.037785243 | 0.578 | 0.125 | 1.08E-120 |
| Pgm1       | 1.19E-123 | 0.592141061 | 0.475 | 0.076 | 2.52E-119 |
| Ifngr1     | 2.27E-123 | 0.492167657 | 0.347 | 0.041 | 4.82E-119 |
| Col4a1     | 7.33E-123 | 0.370708213 | 0.25  | 0.021 | 1.55E-118 |
| Ly6e       | 2.71E-121 | 1.57645702  | 0.925 | 0.434 | 5.74E-117 |
| Tm4sf4     | 4.24E-121 | 1.986565198 | 0.766 | 0.249 | 9.00E-117 |
| Tmem176b   | 1.32E-120 | 1.916099501 | 0.841 | 0.35  | 2.80E-116 |
| Hpx        | 1.67E-120 | 2.020144348 | 0.994 | 0.932 | 3.53E-116 |
| Depp1      | 1.92E-120 | 0.581388961 | 0.347 | 0.043 | 4.07E-116 |
| Mvp        | 7.83E-116 | 0.477864708 | 0.328 | 0.04  | 1.66E-111 |
| Tubb5      | 9.22E-116 | 1.156778764 | 0.606 | 0.138 | 1.95E-111 |
| Ets2       | 6.15E-115 | 0.535451574 | 0.35  | 0.045 | 1.30E-110 |
| H2-Q7      | 1.27E-114 | 0.835998862 | 0.606 | 0.131 | 2.70E-110 |
| Ndrp1      | 2.41E-112 | 0.433813995 | 0.319 | 0.038 | 5.12E-108 |
| B4galt5    | 2.33E-111 | 0.5123126   | 0.344 | 0.045 | 4.94E-107 |
| Tmem176a   | 5.13E-111 | 1.562149547 | 0.838 | 0.361 | 1.09E-106 |
| Ugt2b37    | 6.56E-110 | 0.544975181 | 0.253 | 0.025 | 1.39E-105 |
| Alcam      | 3.62E-107 | 1.280587749 | 0.684 | 0.197 | 7.66E-103 |
| Fam124a    | 7.92E-107 | 0.390158411 | 0.253 | 0.025 | 1.68E-102 |
| Cxadr      | 2.57E-106 | 1.395628059 | 0.816 | 0.308 | 5.46E-102 |
| Sox9       | 2.77E-106 | 0.728119153 | 0.422 | 0.07  | 5.86E-102 |
| Rras       | 8.42E-105 | 0.631631107 | 0.444 | 0.078 | 1.78E-100 |
| Hp         | 1.07E-104 | 1.658749015 | 0.994 | 0.93  | 2.26E-100 |
| Defb1      | 2.00E-103 | 0.596038776 | 0.278 | 0.032 | 4.24E-99  |

|          |           |             |       |       |          |
|----------|-----------|-------------|-------|-------|----------|
| Lmna     | 3.65E-102 | 0.616115144 | 0.462 | 0.084 | 7.74E-98 |
| Wfdc2    | 4.26E-101 | 0.569744215 | 0.309 | 0.04  | 9.02E-97 |
| Slc10a2  | 1.44E-99  | 0.756552639 | 0.55  | 0.121 | 3.06E-95 |
| Krt8     | 1.50E-99  | 1.890329226 | 0.812 | 0.347 | 3.19E-95 |
| St6gal1  | 3.79E-99  | 0.677186994 | 0.522 | 0.107 | 8.03E-95 |
| Clu      | 2.65E-98  | 2.570635887 | 0.963 | 0.788 | 5.62E-94 |
| Kifc3    | 3.48E-98  | 0.424097044 | 0.269 | 0.031 | 7.37E-94 |
| Kcnq1ot1 | 1.83E-97  | 0.954336267 | 0.559 | 0.134 | 3.88E-93 |
| Krt18    | 5.43E-97  | 1.609053952 | 0.812 | 0.326 | 1.15E-92 |
| Nfe2l2   | 2.13E-96  | 0.734520277 | 0.537 | 0.118 | 4.52E-92 |
| Ppl      | 2.42E-96  | 0.403712123 | 0.294 | 0.038 | 5.14E-92 |
| Tpm1     | 1.20E-95  | 0.589647954 | 0.434 | 0.08  | 2.54E-91 |
| Myl12a   | 9.57E-95  | 1.028615511 | 0.672 | 0.194 | 2.03E-90 |
| Dynll1   | 1.21E-94  | 1.092767645 | 0.744 | 0.236 | 2.58E-90 |
| Arpc1b   | 1.53E-94  | 0.518602508 | 0.409 | 0.072 | 3.24E-90 |
| Jpt1     | 9.71E-94  | 0.563219571 | 0.366 | 0.06  | 2.06E-89 |
| Ramac    | 3.41E-93  | 0.378547656 | 0.275 | 0.035 | 7.22E-89 |
| Cp       | 7.06E-93  | 1.418220287 | 0.984 | 0.784 | 1.50E-88 |
| Ecpas    | 2.26E-92  | 0.310539414 | 0.25  | 0.029 | 4.79E-88 |
| Rbp1     | 6.23E-92  | 0.756935991 | 0.55  | 0.129 | 1.32E-87 |
| Isg15    | 7.15E-92  | 1.479412355 | 0.291 | 0.04  | 1.52E-87 |
| Mpeg1    | 1.92E-90  | 0.495605958 | 0.338 | 0.052 | 4.07E-86 |
| Steap4   | 2.86E-90  | 1.211359626 | 0.65  | 0.189 | 6.06E-86 |
| Gstm3    | 1.39E-88  | 1.315782535 | 0.444 | 0.093 | 2.95E-84 |
| Pgd      | 1.92E-88  | 0.445622954 | 0.366 | 0.061 | 4.08E-84 |
| Birc2    | 2.03E-88  | 0.547869425 | 0.341 | 0.054 | 4.30E-84 |
| Ahnak    | 3.75E-88  | 0.554935127 | 0.353 | 0.058 | 7.95E-84 |
| Lsr      | 1.15E-87  | 0.947246445 | 0.684 | 0.208 | 2.44E-83 |
| Shisa5   | 8.92E-87  | 0.425888123 | 0.35  | 0.057 | 1.89E-82 |
| Eif6     | 2.65E-86  | 0.726917138 | 0.619 | 0.164 | 5.61E-82 |
| Mmp15    | 2.85E-86  | 0.366300683 | 0.322 | 0.049 | 6.04E-82 |
| Fat1     | 4.45E-86  | 0.471331228 | 0.341 | 0.055 | 9.44E-82 |
| Map3k1   | 1.14E-85  | 0.432660571 | 0.309 | 0.046 | 2.43E-81 |
| Cldn3    | 3.23E-85  | 0.900976181 | 0.603 | 0.168 | 6.84E-81 |
| Vnn1     | 4.94E-85  | 0.447584143 | 0.275 | 0.037 | 1.05E-80 |
| App      | 8.91E-85  | 0.654373729 | 0.397 | 0.076 | 1.89E-80 |
| Dsp      | 3.78E-84  | 0.492454451 | 0.397 | 0.074 | 8.01E-80 |
| Saa1     | 4.32E-84  | 2.567253311 | 0.787 | 0.305 | 9.17E-80 |
| Ablim1   | 1.37E-83  | 0.500402231 | 0.412 | 0.08  | 2.90E-79 |
| Gas6     | 1.79E-83  | 0.448273942 | 0.269 | 0.037 | 3.80E-79 |
| Myh9     | 3.56E-83  | 0.609146533 | 0.478 | 0.105 | 7.54E-79 |
| Plpp2    | 6.42E-83  | 0.439410915 | 0.341 | 0.057 | 1.36E-78 |
| Desi2    | 2.82E-82  | 0.56865687  | 0.566 | 0.139 | 5.97E-78 |

|           |          |             |       |       |          |
|-----------|----------|-------------|-------|-------|----------|
| Rhou      | 4.06E-82 | 0.72440178  | 0.603 | 0.161 | 8.61E-78 |
| Ahsg      | 4.13E-82 | 1.041109697 | 0.997 | 0.989 | 8.76E-78 |
| Tpm4      | 1.32E-81 | 0.327956481 | 0.262 | 0.035 | 2.81E-77 |
| Tns3      | 1.92E-79 | 0.31157425  | 0.259 | 0.035 | 4.06E-75 |
| Nav2      | 3.00E-79 | 0.465671421 | 0.375 | 0.07  | 6.37E-75 |
| Cd2ap     | 5.30E-79 | 0.760419264 | 0.569 | 0.153 | 1.12E-74 |
| Samd9l    | 6.64E-79 | 0.337908707 | 0.275 | 0.04  | 1.41E-74 |
| Ywhah     | 1.48E-78 | 0.781055882 | 0.603 | 0.17  | 3.13E-74 |
| Pdlim1    | 1.68E-77 | 0.45404857  | 0.428 | 0.089 | 3.56E-73 |
| Igtp      | 2.47E-77 | 0.561718971 | 0.25  | 0.034 | 5.25E-73 |
| Mapk3     | 1.05E-76 | 0.375048456 | 0.3   | 0.048 | 2.23E-72 |
| Gc        | 1.73E-76 | 0.783505512 | 1     | 0.98  | 3.66E-72 |
| Colgalt1  | 1.25E-74 | 0.568586189 | 0.503 | 0.122 | 2.66E-70 |
| 9-Sep     | 2.48E-74 | 0.517286001 | 0.472 | 0.109 | 5.25E-70 |
| Slc4a4    | 7.74E-74 | 0.813720093 | 0.7   | 0.228 | 1.64E-69 |
| Itm2c     | 6.55E-73 | 0.365760372 | 0.297 | 0.049 | 1.39E-68 |
| Ntrk2     | 2.22E-72 | 0.364896799 | 0.25  | 0.036 | 4.71E-68 |
| Ppp4c     | 5.99E-72 | 0.414538832 | 0.403 | 0.085 | 1.27E-67 |
| Atpif1    | 7.75E-72 | 0.670108478 | 0.556 | 0.153 | 1.64E-67 |
| Dag1      | 9.63E-72 | 0.6661454   | 0.494 | 0.126 | 2.04E-67 |
| Mgst3     | 5.53E-71 | 0.427659318 | 0.344 | 0.066 | 1.17E-66 |
| Serpina10 | 1.02E-69 | 0.88672363  | 0.772 | 0.306 | 2.17E-65 |
| Chmp2b    | 1.19E-69 | 0.440147156 | 0.444 | 0.102 | 2.52E-65 |
| Irgm2     | 1.46E-68 | 0.458849816 | 0.281 | 0.047 | 3.11E-64 |
| Tceal9    | 2.81E-68 | 0.521660635 | 0.403 | 0.091 | 5.96E-64 |
| Eppk1     | 4.29E-68 | 0.37993259  | 0.369 | 0.075 | 9.10E-64 |
| Hsd17b13  | 6.48E-68 | 1.440167112 | 0.831 | 0.453 | 1.37E-63 |
| Rtn4      | 8.23E-68 | 1.136424149 | 0.694 | 0.268 | 1.74E-63 |
| Serinc5   | 9.69E-68 | 0.367429582 | 0.344 | 0.067 | 2.05E-63 |
| Rnf213    | 1.37E-67 | 0.524422182 | 0.359 | 0.075 | 2.90E-63 |
| Otud7b    | 7.92E-67 | 0.273854236 | 0.284 | 0.048 | 1.68E-62 |
| Nostrin   | 8.88E-67 | 0.349410233 | 0.319 | 0.06  | 1.88E-62 |
| Slc6a6    | 1.24E-66 | 0.711443285 | 0.672 | 0.211 | 2.63E-62 |
| Gars      | 1.71E-66 | 0.347936407 | 0.341 | 0.067 | 3.62E-62 |
| C3        | 8.27E-66 | 1.20701631  | 0.981 | 0.924 | 1.75E-61 |
| Myl12b    | 2.90E-65 | 0.585047272 | 0.562 | 0.162 | 6.14E-61 |
| Cd47      | 3.17E-65 | 0.820428032 | 0.753 | 0.283 | 6.73E-61 |
| Baiap2    | 3.53E-65 | 0.346580517 | 0.359 | 0.074 | 7.49E-61 |
| Nedd4l    | 8.20E-65 | 0.529507231 | 0.484 | 0.127 | 1.74E-60 |
| Mt2       | 1.00E-64 | 0.833162122 | 0.497 | 0.139 | 2.12E-60 |
| Serping1  | 1.06E-64 | 0.935923034 | 0.931 | 0.591 | 2.25E-60 |
| Ambp      | 2.51E-64 | 0.865833236 | 0.981 | 0.846 | 5.33E-60 |
| Cyr61     | 1.23E-63 | 0.500966558 | 0.266 | 0.046 | 2.61E-59 |

|         |          |             |       |       |          |
|---------|----------|-------------|-------|-------|----------|
| Ifi47   | 4.20E-63 | 0.719673648 | 0.334 | 0.07  | 8.90E-59 |
| Cadm1   | 6.43E-63 | 0.433709996 | 0.378 | 0.084 | 1.36E-58 |
| Nectin2 | 7.12E-63 | 0.463743621 | 0.416 | 0.099 | 1.51E-58 |
| Med21   | 1.27E-62 | 0.515657649 | 0.525 | 0.147 | 2.68E-58 |
| Sqstm1  | 3.17E-62 | 0.721178955 | 0.647 | 0.218 | 6.73E-58 |
| Asah1   | 5.31E-62 | 0.377648762 | 0.366 | 0.08  | 1.13E-57 |
| Arhgdia | 4.60E-61 | 0.395128969 | 0.409 | 0.097 | 9.76E-57 |
| Reep5   | 5.90E-61 | 0.353824831 | 0.391 | 0.09  | 1.25E-56 |
| Trf     | 2.80E-60 | 0.784457428 | 1     | 0.998 | 5.94E-56 |
| Srxn1   | 5.07E-60 | 0.37435423  | 0.278 | 0.051 | 1.08E-55 |
| Hacd2   | 5.89E-60 | 0.477704433 | 0.494 | 0.135 | 1.25E-55 |
| Ddx39b  | 2.86E-59 | 0.367329582 | 0.362 | 0.081 | 6.07E-55 |
| Anxa7   | 4.91E-59 | 0.447659838 | 0.531 | 0.151 | 1.04E-54 |
| Tpr     | 5.36E-59 | 0.555177479 | 0.547 | 0.166 | 1.14E-54 |
| Spint2  | 7.22E-59 | 0.636949446 | 0.591 | 0.194 | 1.53E-54 |
| Tspo    | 1.24E-58 | 0.746264713 | 0.716 | 0.284 | 2.63E-54 |
| Gss     | 1.58E-58 | 0.429621009 | 0.428 | 0.109 | 3.34E-54 |
| Psme1   | 3.03E-58 | 0.559149166 | 0.622 | 0.204 | 6.42E-54 |
| Uhrf2   | 3.63E-58 | 0.366582566 | 0.378 | 0.088 | 7.69E-54 |
| Ppia    | 7.43E-58 | 0.821411847 | 0.978 | 0.845 | 1.58E-53 |
| Gstm5   | 7.50E-58 | 0.369649987 | 0.303 | 0.062 | 1.59E-53 |
| Frrs1   | 7.63E-58 | 0.420329855 | 0.419 | 0.106 | 1.62E-53 |
| Npc2    | 1.07E-57 | 0.587791589 | 0.606 | 0.199 | 2.28E-53 |
| Crip2   | 1.45E-57 | 0.569514393 | 0.559 | 0.174 | 3.07E-53 |
| Ifitm3  | 2.01E-57 | 0.730474864 | 0.991 | 0.886 | 4.27E-53 |
| Cd151   | 2.89E-57 | 0.305846257 | 0.272 | 0.051 | 6.14E-53 |
| Sorbs2  | 5.33E-57 | 0.966195857 | 0.691 | 0.284 | 1.13E-52 |
| Sqle    | 7.20E-57 | 0.475676792 | 0.406 | 0.103 | 1.53E-52 |
| Idh2    | 9.82E-57 | 0.493410901 | 0.575 | 0.179 | 2.08E-52 |
| Ube2v2  | 1.24E-56 | 0.606256898 | 0.459 | 0.13  | 2.64E-52 |
| Tbrg1   | 2.15E-56 | 0.406972846 | 0.406 | 0.102 | 4.57E-52 |
| Hspa4l  | 3.03E-56 | 0.409146065 | 0.362 | 0.085 | 6.43E-52 |
| Acsl4   | 3.48E-56 | 0.592243758 | 0.6   | 0.198 | 7.37E-52 |
| H2-D1   | 4.18E-56 | 0.925614942 | 0.875 | 0.486 | 8.85E-52 |
| Apcs    | 5.06E-56 | 0.868227104 | 0.681 | 0.257 | 1.07E-51 |
| Atp6v0e | 7.34E-56 | 0.717217701 | 0.697 | 0.269 | 1.56E-51 |
| Grn     | 3.19E-55 | 0.680386245 | 0.625 | 0.22  | 6.77E-51 |
| Trp53   | 9.14E-55 | 0.25523345  | 0.269 | 0.051 | 1.94E-50 |
| Fkbp1a  | 1.21E-54 | 0.605013049 | 0.606 | 0.206 | 2.56E-50 |
| Cobl    | 1.51E-54 | 0.286555639 | 0.275 | 0.053 | 3.19E-50 |
| Sat1    | 1.55E-54 | 0.639384738 | 0.641 | 0.229 | 3.28E-50 |
| Lgmn    | 2.42E-54 | 0.380826038 | 0.306 | 0.065 | 5.12E-50 |
| Rock2   | 6.72E-54 | 0.353471533 | 0.381 | 0.094 | 1.43E-49 |



|          |          |             |       |       |          |
|----------|----------|-------------|-------|-------|----------|
| Pbx1     | 6.89E-54 | 0.341015491 | 0.278 | 0.056 | 1.46E-49 |
| Hspb1    | 1.02E-53 | 0.498982768 | 0.291 | 0.061 | 2.17E-49 |
| Dnajc10  | 1.27E-53 | 0.270767035 | 0.259 | 0.049 | 2.70E-49 |
| Atp9a    | 4.01E-53 | 0.300739391 | 0.291 | 0.06  | 8.49E-49 |
| Mrps6    | 4.55E-53 | 0.255895734 | 0.306 | 0.065 | 9.64E-49 |
| Ephx1    | 6.46E-53 | 0.496588389 | 0.528 | 0.162 | 1.37E-48 |
| Gnb1     | 6.68E-53 | 0.485304334 | 0.559 | 0.178 | 1.42E-48 |
| AW112010 | 1.14E-52 | 1.06224174  | 0.884 | 0.477 | 2.42E-48 |
| Myo10    | 1.24E-52 | 0.284506801 | 0.309 | 0.067 | 2.63E-48 |
| Ccl9     | 1.31E-52 | 0.770785719 | 0.631 | 0.232 | 2.79E-48 |
| Akap13   | 1.66E-52 | 0.508951286 | 0.466 | 0.136 | 3.51E-48 |
| Limal    | 1.97E-52 | 0.373010718 | 0.359 | 0.087 | 4.18E-48 |
| Tnfaip1  | 2.47E-52 | 0.272796761 | 0.3   | 0.064 | 5.25E-48 |
| Hdac5    | 2.80E-52 | 0.274259672 | 0.253 | 0.048 | 5.94E-48 |
| Fbxo6    | 3.05E-52 | 0.359202409 | 0.353 | 0.085 | 6.47E-48 |
| Fkbp11   | 4.71E-52 | 0.360192541 | 0.372 | 0.093 | 9.98E-48 |
| Sri      | 4.98E-52 | 0.287424751 | 0.419 | 0.109 | 1.06E-47 |
| Plekha5  | 5.65E-52 | 0.282933836 | 0.297 | 0.063 | 1.20E-47 |
| Acin1    | 6.06E-52 | 0.289519902 | 0.331 | 0.076 | 1.28E-47 |
| Palmd    | 6.70E-52 | 0.353509302 | 0.353 | 0.085 | 1.42E-47 |
| Sptan1   | 6.72E-52 | 0.330233494 | 0.278 | 0.057 | 1.42E-47 |
| Adgrl2   | 6.81E-52 | 0.40287801  | 0.378 | 0.096 | 1.44E-47 |
| Mup20    | 9.58E-52 | 1.346015486 | 1     | 0.987 | 2.03E-47 |
| Anxa4    | 1.74E-51 | 0.372170244 | 0.391 | 0.101 | 3.69E-47 |
| Adh1     | 2.96E-51 | 0.892721438 | 0.944 | 0.689 | 6.27E-47 |
| Ppp1r14b | 3.96E-51 | 0.385057816 | 0.409 | 0.11  | 8.40E-47 |
| Tuba1b   | 4.02E-51 | 0.443688782 | 0.297 | 0.066 | 8.52E-47 |
| Trim25   | 4.34E-51 | 0.382257342 | 0.403 | 0.106 | 9.19E-47 |
| Dsc2     | 4.44E-51 | 0.355552818 | 0.362 | 0.089 | 9.42E-47 |
| Snx10    | 4.83E-51 | 0.489951638 | 0.469 | 0.139 | 1.02E-46 |
| Psmb10   | 7.28E-51 | 0.286677196 | 0.347 | 0.083 | 1.54E-46 |
| Bax      | 1.23E-50 | 0.405303387 | 0.409 | 0.111 | 2.60E-46 |
| St3gal4  | 1.38E-50 | 0.431336556 | 0.419 | 0.115 | 2.93E-46 |
| Itgb5    | 1.85E-50 | 0.348369835 | 0.328 | 0.077 | 3.93E-46 |
| Glamp    | 2.12E-50 | 0.262971814 | 0.359 | 0.088 | 4.49E-46 |
| Pla1a    | 2.24E-50 | 0.361952145 | 0.378 | 0.097 | 4.74E-46 |
| Ccnd1    | 2.29E-50 | 0.476122303 | 0.303 | 0.07  | 4.85E-46 |
| Sugt1    | 2.36E-50 | 0.290821384 | 0.372 | 0.093 | 5.00E-46 |
| Micu2    | 2.42E-50 | 0.262777924 | 0.291 | 0.062 | 5.13E-46 |
| Rnpep    | 2.94E-50 | 0.292242475 | 0.284 | 0.06  | 6.24E-46 |
| Gng12    | 3.44E-50 | 0.417327994 | 0.55  | 0.173 | 7.29E-46 |
| Cxcl14   | 4.22E-50 | 0.459596263 | 0.294 | 0.065 | 8.95E-46 |
| Slc35f5  | 4.71E-50 | 0.334427182 | 0.369 | 0.093 | 9.99E-46 |

|          |          |             |       |       |          |
|----------|----------|-------------|-------|-------|----------|
| Arl6ip5  | 5.39E-50 | 0.284533785 | 0.278 | 0.058 | 1.14E-45 |
| Litaf    | 5.60E-50 | 0.569131384 | 0.616 | 0.222 | 1.19E-45 |
| Gnai2    | 5.95E-50 | 0.386101809 | 0.45  | 0.129 | 1.26E-45 |
| Creb3l2  | 1.42E-49 | 0.349270619 | 0.312 | 0.072 | 3.02E-45 |
| Mpp1     | 1.49E-49 | 0.269361772 | 0.319 | 0.074 | 3.15E-45 |
| Rhod     | 1.53E-49 | 0.267167436 | 0.306 | 0.069 | 3.24E-45 |
| Mbd2     | 2.19E-49 | 0.328209585 | 0.45  | 0.127 | 4.64E-45 |
| Ctnna1   | 2.80E-49 | 0.417559306 | 0.522 | 0.162 | 5.93E-45 |
| Gstm1    | 3.21E-49 | 1.264601432 | 0.938 | 0.793 | 6.81E-45 |
| Gpx4     | 3.25E-49 | 0.833008521 | 0.925 | 0.677 | 6.89E-45 |
| Maged1   | 3.81E-49 | 0.475403022 | 0.491 | 0.151 | 8.08E-45 |
| Fndc3b   | 5.03E-49 | 0.441453475 | 0.456 | 0.135 | 1.07E-44 |
| Ago2     | 6.25E-49 | 0.264304619 | 0.272 | 0.057 | 1.32E-44 |
| Phip     | 6.73E-49 | 0.303409841 | 0.334 | 0.08  | 1.43E-44 |
| Cnih4    | 1.53E-48 | 0.380065748 | 0.384 | 0.102 | 3.23E-44 |
| Mob1a    | 1.56E-48 | 0.302499995 | 0.378 | 0.097 | 3.31E-44 |
| Acsl3    | 1.92E-48 | 0.263280818 | 0.3   | 0.068 | 4.08E-44 |
| Calu     | 2.12E-48 | 0.464453555 | 0.5   | 0.155 | 4.50E-44 |
| Tmpo     | 2.91E-48 | 0.387247242 | 0.375 | 0.099 | 6.17E-44 |
| Selenoh  | 3.03E-48 | 0.370326825 | 0.266 | 0.056 | 6.42E-44 |
| Ttc3     | 4.85E-48 | 0.319370297 | 0.275 | 0.06  | 1.03E-43 |
| Hspa8    | 5.73E-48 | 0.829868153 | 0.95  | 0.749 | 1.22E-43 |
| Lgals3bp | 6.06E-48 | 0.364036312 | 0.331 | 0.082 | 1.29E-43 |
| Pcsk9    | 9.88E-48 | 0.309783321 | 0.256 | 0.053 | 2.10E-43 |
| Tubb2a   | 1.48E-47 | 0.541130765 | 0.644 | 0.243 | 3.14E-43 |
| Serinc3  | 1.68E-47 | 0.690643586 | 0.766 | 0.345 | 3.55E-43 |
| Gcnt2    | 2.03E-47 | 0.34596213  | 0.253 | 0.052 | 4.31E-43 |
| Snrpc    | 2.55E-47 | 0.275101002 | 0.416 | 0.114 | 5.41E-43 |
| Gm10073  | 3.72E-47 | 0.28731513  | 0.281 | 0.063 | 7.88E-43 |
| Fgl1     | 4.76E-47 | 0.912889594 | 0.809 | 0.398 | 1.01E-42 |
| Tra2a    | 6.21E-47 | 0.299892488 | 0.334 | 0.083 | 1.32E-42 |
| Cdh1     | 1.04E-46 | 0.482169825 | 0.553 | 0.186 | 2.21E-42 |
| Diaph1   | 1.31E-46 | 0.4153069   | 0.431 | 0.127 | 2.78E-42 |
| Cdk6     | 1.37E-46 | 0.343463664 | 0.322 | 0.079 | 2.90E-42 |
| Hnrnpa1  | 1.38E-46 | 0.402963349 | 0.425 | 0.123 | 2.92E-42 |
| Tapbp    | 1.61E-46 | 0.452196185 | 0.491 | 0.155 | 3.40E-42 |
| Map3k13  | 1.73E-46 | 0.251690152 | 0.256 | 0.054 | 3.67E-42 |
| Serpinc1 | 1.78E-46 | 0.751856529 | 0.972 | 0.799 | 3.77E-42 |
| P2rx4    | 3.13E-46 | 0.33818116  | 0.309 | 0.074 | 6.64E-42 |
| Cr11     | 3.96E-46 | 0.318473548 | 0.331 | 0.083 | 8.39E-42 |
| Med28    | 4.41E-46 | 0.350049082 | 0.359 | 0.095 | 9.36E-42 |
| Raph1    | 5.24E-46 | 0.661983825 | 0.666 | 0.269 | 1.11E-41 |
| Ctsl     | 6.36E-46 | 0.779948416 | 0.919 | 0.618 | 1.35E-41 |

|          |          |             |       |       |          |
|----------|----------|-------------|-------|-------|----------|
| Nabp1    | 6.43E-46 | 0.286558499 | 0.256 | 0.054 | 1.36E-41 |
| Commd2   | 6.53E-46 | 0.277427572 | 0.309 | 0.074 | 1.38E-41 |
| C2       | 7.19E-46 | 0.370045975 | 0.478 | 0.146 | 1.52E-41 |
| Wnk1     | 1.19E-45 | 0.483124671 | 0.588 | 0.209 | 2.52E-41 |
| Mt1      | 1.45E-45 | 1.058006368 | 0.8   | 0.413 | 3.07E-41 |
| Pmvk     | 2.59E-45 | 0.465221007 | 0.519 | 0.174 | 5.50E-41 |
| Cct4     | 2.87E-45 | 0.447117735 | 0.603 | 0.215 | 6.08E-41 |
| Ptprj    | 3.27E-45 | 0.287681329 | 0.316 | 0.077 | 6.94E-41 |
| Tnfrsf1a | 4.16E-45 | 0.285787092 | 0.375 | 0.102 | 8.81E-41 |
| Tspan4   | 5.34E-45 | 0.346082833 | 0.388 | 0.109 | 1.13E-40 |
| Cd36     | 6.33E-45 | 0.345601603 | 0.278 | 0.064 | 1.34E-40 |
| Atp1b1   | 6.99E-45 | 0.455271002 | 0.453 | 0.141 | 1.48E-40 |
| Actg1    | 7.90E-45 | 0.881000979 | 0.734 | 0.352 | 1.67E-40 |
| Tstd1    | 9.09E-45 | 0.483399593 | 0.372 | 0.104 | 1.93E-40 |
| Fn1      | 9.67E-45 | 0.723246662 | 0.966 | 0.766 | 2.05E-40 |
| Lims1    | 1.06E-44 | 0.279108227 | 0.278 | 0.063 | 2.24E-40 |
| Fdft1    | 1.25E-44 | 0.43082784  | 0.45  | 0.139 | 2.64E-40 |
| Spes1    | 1.30E-44 | 0.675626426 | 0.787 | 0.381 | 2.76E-40 |
| Nfkb1    | 1.43E-44 | 0.32634042  | 0.253 | 0.055 | 3.02E-40 |
| Tcim     | 2.38E-44 | 0.383301072 | 0.438 | 0.133 | 5.05E-40 |
| Bag3     | 2.50E-44 | 0.334629013 | 0.312 | 0.078 | 5.31E-40 |
| Cfdp1    | 2.51E-44 | 0.340248115 | 0.45  | 0.137 | 5.32E-40 |
| Rpl27    | 3.47E-44 | 0.705457086 | 0.838 | 0.456 | 7.37E-40 |
| Mbnl2    | 4.79E-44 | 0.397008161 | 0.409 | 0.121 | 1.02E-39 |
| B2m      | 4.88E-44 | 0.566642071 | 1     | 0.949 | 1.04E-39 |
| Maea     | 5.22E-44 | 0.287756964 | 0.275 | 0.063 | 1.11E-39 |
| Pdcl3    | 7.18E-44 | 0.264722505 | 0.319 | 0.08  | 1.52E-39 |
| Cnn3     | 1.77E-43 | 0.531220635 | 0.637 | 0.247 | 3.75E-39 |
| Lrif1    | 2.04E-43 | 0.26959849  | 0.253 | 0.055 | 4.31E-39 |
| Stbd1    | 2.38E-43 | 0.299927049 | 0.356 | 0.096 | 5.04E-39 |
| Mdfic    | 2.38E-43 | 0.287407469 | 0.3   | 0.073 | 5.06E-39 |
| Dsg2     | 2.49E-43 | 0.456190627 | 0.55  | 0.19  | 5.28E-39 |
| Tmem97   | 2.58E-43 | 0.401417816 | 0.438 | 0.134 | 5.47E-39 |
| Twsg1    | 3.00E-43 | 0.326278911 | 0.362 | 0.099 | 6.37E-39 |
| Mat2a    | 3.85E-43 | 0.403548323 | 0.503 | 0.165 | 8.16E-39 |
| Aqp8     | 5.21E-43 | 0.641740166 | 0.588 | 0.227 | 1.10E-38 |
| Gm26917  | 5.22E-43 | 0.253015944 | 0.344 | 0.091 | 1.11E-38 |
| Hexa     | 5.27E-43 | 0.260013746 | 0.284 | 0.068 | 1.12E-38 |
| Rrp1     | 6.43E-43 | 0.282253654 | 0.403 | 0.116 | 1.36E-38 |
| Bub3     | 6.44E-43 | 0.273884192 | 0.306 | 0.076 | 1.36E-38 |
| Itih2    | 6.82E-43 | 0.790508707 | 0.853 | 0.525 | 1.45E-38 |
| Nck1     | 7.32E-43 | 0.325135854 | 0.316 | 0.081 | 1.55E-38 |
| Lrg1     | 7.46E-43 | 0.978058401 | 0.897 | 0.621 | 1.58E-38 |

|            |          |             |       |       |          |
|------------|----------|-------------|-------|-------|----------|
| Zfp950     | 1.10E-42 | 0.259178355 | 0.284 | 0.068 | 2.33E-38 |
| Arf3       | 1.40E-42 | 0.315656282 | 0.431 | 0.129 | 2.97E-38 |
| Mcl1       | 1.41E-42 | 0.414603649 | 0.534 | 0.184 | 3.00E-38 |
| Cebpg      | 1.71E-42 | 0.365236416 | 0.403 | 0.12  | 3.62E-38 |
| Vps29      | 2.24E-42 | 0.358647241 | 0.503 | 0.167 | 4.74E-38 |
| Vtn        | 2.45E-42 | 0.715304958 | 0.972 | 0.833 | 5.20E-38 |
| Cdc42      | 2.59E-42 | 0.610692277 | 0.741 | 0.34  | 5.50E-38 |
| Vnn3       | 2.94E-42 | 0.26997184  | 0.281 | 0.067 | 6.24E-38 |
| AC149090.1 | 3.60E-42 | 0.272383635 | 0.288 | 0.069 | 7.62E-38 |
| Ifitm2     | 3.70E-42 | 0.686302061 | 0.872 | 0.493 | 7.84E-38 |
| Nisch      | 3.97E-42 | 0.369047061 | 0.459 | 0.145 | 8.42E-38 |
| Prdx4      | 5.61E-42 | 0.604173223 | 0.694 | 0.299 | 1.19E-37 |
| Gnb2       | 5.95E-42 | 0.476910986 | 0.594 | 0.224 | 1.26E-37 |
| Ctnnd1     | 8.55E-42 | 0.420982298 | 0.481 | 0.159 | 1.81E-37 |
| Hnrnpm     | 9.36E-42 | 0.293982777 | 0.444 | 0.136 | 1.98E-37 |
| Slc17a4    | 1.14E-41 | 0.299756324 | 0.356 | 0.098 | 2.43E-37 |
| Psme2      | 1.74E-41 | 0.352067362 | 0.55  | 0.191 | 3.69E-37 |
| Adam10     | 1.75E-41 | 0.256670817 | 0.3   | 0.075 | 3.71E-37 |
| Dusp16     | 2.11E-41 | 0.329196272 | 0.303 | 0.078 | 4.48E-37 |
| Tkt        | 2.32E-41 | 0.367728185 | 0.503 | 0.168 | 4.93E-37 |
| G3bp2      | 3.13E-41 | 0.494932513 | 0.634 | 0.242 | 6.63E-37 |
| Rnh1       | 4.51E-41 | 0.36840027  | 0.478 | 0.159 | 9.55E-37 |
| Afdn       | 9.25E-41 | 0.277588759 | 0.35  | 0.097 | 1.96E-36 |
| Alyref     | 1.02E-40 | 0.294897791 | 0.322 | 0.086 | 2.17E-36 |
| Gsta4      | 1.11E-40 | 0.353349406 | 0.459 | 0.149 | 2.35E-36 |
| Nrip1      | 1.24E-40 | 0.30779936  | 0.328 | 0.088 | 2.62E-36 |
| Ube2z      | 1.26E-40 | 0.253908314 | 0.331 | 0.089 | 2.67E-36 |
| Ptma       | 1.32E-40 | 0.774196475 | 0.938 | 0.708 | 2.79E-36 |
| Itgb1      | 1.52E-40 | 0.428579791 | 0.559 | 0.201 | 3.23E-36 |
| Csad       | 1.70E-40 | 0.787936082 | 0.597 | 0.251 | 3.61E-36 |
| Myl6       | 2.35E-40 | 0.695948751 | 0.859 | 0.545 | 4.99E-36 |
| Rdh11      | 3.53E-40 | 0.279702523 | 0.291 | 0.073 | 7.48E-36 |
| Itgav      | 3.54E-40 | 0.364612268 | 0.306 | 0.081 | 7.50E-36 |
| Cst3       | 4.03E-40 | 0.560171624 | 0.781 | 0.364 | 8.54E-36 |
| H2-K1      | 4.04E-40 | 0.607820952 | 0.988 | 0.849 | 8.57E-36 |
| Sptbn1     | 4.13E-40 | 0.347019098 | 0.391 | 0.118 | 8.76E-36 |
| Vps28      | 4.39E-40 | 0.340804844 | 0.462 | 0.151 | 9.31E-36 |
| Abhd2      | 4.68E-40 | 0.299707134 | 0.378 | 0.11  | 9.92E-36 |
| Gusb       | 5.18E-40 | 0.272311977 | 0.269 | 0.065 | 1.10E-35 |
| Calm2      | 5.38E-40 | 0.649522971 | 0.759 | 0.381 | 1.14E-35 |
| Zbtb20     | 5.91E-40 | 0.801341601 | 0.922 | 0.654 | 1.25E-35 |
| Mug2       | 7.31E-40 | 0.728763597 | 0.806 | 0.403 | 1.55E-35 |
| Eef1a1     | 7.70E-40 | 0.519356787 | 1     | 0.988 | 1.63E-35 |

|               |          |             |       |       |          |
|---------------|----------|-------------|-------|-------|----------|
| Chka          | 8.95E-40 | 0.605644083 | 0.662 | 0.279 | 1.90E-35 |
| Cpq           | 9.52E-40 | 0.381073802 | 0.462 | 0.153 | 2.02E-35 |
| Cox19         | 1.16E-39 | 0.356934531 | 0.45  | 0.147 | 2.45E-35 |
| Abcb4         | 1.79E-39 | 0.517688371 | 0.597 | 0.235 | 3.80E-35 |
| Hax1          | 1.81E-39 | 0.250298482 | 0.372 | 0.107 | 3.83E-35 |
| Lasp1         | 2.31E-39 | 0.364157763 | 0.591 | 0.215 | 4.89E-35 |
| Plin3         | 2.62E-39 | 0.250123659 | 0.303 | 0.079 | 5.55E-35 |
| 4930402H24Rik | 3.17E-39 | 0.253620284 | 0.3   | 0.078 | 6.71E-35 |
| Psmc8         | 3.20E-39 | 0.542534885 | 0.697 | 0.304 | 6.78E-35 |
| Ermp1         | 3.47E-39 | 0.252104535 | 0.25  | 0.058 | 7.35E-35 |
| Banf1         | 4.51E-39 | 0.297203786 | 0.391 | 0.118 | 9.57E-35 |
| Bcap31        | 5.88E-39 | 0.466308313 | 0.681 | 0.276 | 1.25E-34 |
| Nop58         | 8.07E-39 | 0.254457673 | 0.272 | 0.067 | 1.71E-34 |
| H13           | 8.39E-39 | 0.447670899 | 0.566 | 0.213 | 1.78E-34 |
| Nap111        | 9.17E-39 | 0.52610077  | 0.588 | 0.229 | 1.94E-34 |
| Ik            | 1.00E-38 | 0.270249378 | 0.406 | 0.125 | 2.12E-34 |
| Hsp90aa1      | 1.15E-38 | 0.812931538 | 0.803 | 0.471 | 2.44E-34 |
| Slc16a1       | 1.34E-38 | 0.340788651 | 0.375 | 0.113 | 2.84E-34 |
| Hnrnp1        | 1.36E-38 | 0.305316047 | 0.459 | 0.15  | 2.87E-34 |
| Ifrd1         | 1.55E-38 | 0.286125249 | 0.269 | 0.066 | 3.29E-34 |
| Dnajc1        | 1.65E-38 | 0.260309388 | 0.35  | 0.1   | 3.50E-34 |
| Acp5          | 2.52E-38 | 0.402357653 | 0.5   | 0.177 | 5.34E-34 |
| Fasn          | 2.84E-38 | 0.448090466 | 0.566 | 0.209 | 6.03E-34 |
| Tuba1c        | 4.25E-38 | 0.330053745 | 0.362 | 0.109 | 9.01E-34 |
| Bmpr1a        | 4.30E-38 | 0.263295559 | 0.291 | 0.075 | 9.12E-34 |
| Nectin1       | 4.64E-38 | 0.312977595 | 0.369 | 0.11  | 9.85E-34 |
| Chdh          | 4.87E-38 | 0.301497913 | 0.4   | 0.124 | 1.03E-33 |
| Agl           | 5.28E-38 | 0.258227779 | 0.253 | 0.061 | 1.12E-33 |
| Vwa5a         | 1.29E-37 | 0.304070204 | 0.278 | 0.071 | 2.74E-33 |
| Hmgn1         | 1.52E-37 | 0.577941832 | 0.694 | 0.316 | 3.22E-33 |
| Kdm2a         | 2.48E-37 | 0.266423008 | 0.369 | 0.11  | 5.25E-33 |
| Capns1        | 2.82E-37 | 0.411284048 | 0.544 | 0.202 | 5.98E-33 |
| Trip11        | 2.84E-37 | 0.262622372 | 0.356 | 0.104 | 6.01E-33 |
| Krit1         | 3.03E-37 | 0.279033652 | 0.312 | 0.086 | 6.42E-33 |
| Pkp2          | 3.12E-37 | 0.259109367 | 0.294 | 0.078 | 6.60E-33 |
| St5           | 3.26E-37 | 0.261079052 | 0.328 | 0.093 | 6.90E-33 |
| Clptm1        | 3.37E-37 | 0.308911377 | 0.359 | 0.108 | 7.15E-33 |
| Hsp90ab1      | 3.61E-37 | 0.692097365 | 0.953 | 0.778 | 7.65E-33 |
| Srsf7         | 3.81E-37 | 0.26847996  | 0.338 | 0.098 | 8.08E-33 |
| Dmd           | 4.98E-37 | 0.251048194 | 0.284 | 0.074 | 1.05E-32 |
| Cct7          | 6.03E-37 | 0.304713531 | 0.469 | 0.16  | 1.28E-32 |
| Pon2          | 7.24E-37 | 0.274479061 | 0.456 | 0.151 | 1.54E-32 |
| Eif3l         | 7.80E-37 | 0.33978541  | 0.447 | 0.151 | 1.65E-32 |

|          |          |             |       |       |          |
|----------|----------|-------------|-------|-------|----------|
| Tsen34   | 1.03E-36 | 0.268505939 | 0.344 | 0.101 | 2.19E-32 |
| Hikeshi  | 1.29E-36 | 0.254007199 | 0.359 | 0.107 | 2.73E-32 |
| Sec11a   | 1.36E-36 | 0.432646522 | 0.562 | 0.218 | 2.89E-32 |
| Ddost    | 2.04E-36 | 0.348899515 | 0.45  | 0.154 | 4.32E-32 |
| Jak1     | 3.13E-36 | 0.341329016 | 0.537 | 0.197 | 6.64E-32 |
| Stt3b    | 3.20E-36 | 0.362756756 | 0.512 | 0.187 | 6.79E-32 |
| Nsdhl    | 3.28E-36 | 0.334915417 | 0.369 | 0.114 | 6.96E-32 |
| Irf6     | 6.40E-36 | 0.286363329 | 0.372 | 0.114 | 1.36E-31 |
| Thoc7    | 6.61E-36 | 0.384417412 | 0.569 | 0.215 | 1.40E-31 |
| Ssrp1    | 7.31E-36 | 0.273098057 | 0.344 | 0.102 | 1.55E-31 |
| Socs2    | 7.41E-36 | 0.301373244 | 0.269 | 0.071 | 1.57E-31 |
| Ptprf    | 8.60E-36 | 0.452414133 | 0.603 | 0.242 | 1.82E-31 |
| Tm2d3    | 1.15E-35 | 0.2734998   | 0.338 | 0.1   | 2.44E-31 |
| Abracl   | 1.50E-35 | 0.259351924 | 0.344 | 0.102 | 3.19E-31 |
| Sh3d19   | 1.54E-35 | 0.270017689 | 0.394 | 0.125 | 3.26E-31 |
| Jkamp    | 1.97E-35 | 0.252719496 | 0.309 | 0.087 | 4.17E-31 |
| Cpn1     | 2.00E-35 | 0.440802177 | 0.725 | 0.315 | 4.24E-31 |
| Prg4     | 2.00E-35 | 0.300039723 | 0.256 | 0.065 | 4.25E-31 |
| Psma2    | 2.66E-35 | 0.285037445 | 0.659 | 0.26  | 5.64E-31 |
| C4bp     | 2.80E-35 | 0.635954782 | 0.956 | 0.713 | 5.94E-31 |
| Cfl1     | 3.88E-35 | 0.417951232 | 0.669 | 0.284 | 8.22E-31 |
| Eif3m    | 4.43E-35 | 0.359569545 | 0.578 | 0.223 | 9.39E-31 |
| Plec     | 4.84E-35 | 0.261040885 | 0.284 | 0.077 | 1.03E-30 |
| Tubb4b   | 8.65E-35 | 0.758803033 | 0.506 | 0.203 | 1.83E-30 |
| C6       | 9.42E-35 | 0.463545511 | 0.534 | 0.21  | 2.00E-30 |
| Drg1     | 1.32E-34 | 0.281500683 | 0.362 | 0.112 | 2.80E-30 |
| Polr2k   | 1.41E-34 | 0.363465709 | 0.559 | 0.214 | 2.99E-30 |
| Fubp1    | 1.70E-34 | 0.325090936 | 0.344 | 0.106 | 3.59E-30 |
| Rbms1    | 1.79E-34 | 0.260907514 | 0.366 | 0.113 | 3.79E-30 |
| Clint1   | 3.07E-34 | 0.30749265  | 0.475 | 0.168 | 6.50E-30 |
| Psm7     | 3.61E-34 | 0.3384749   | 0.519 | 0.193 | 7.66E-30 |
| Sh3glb1  | 3.77E-34 | 0.316744758 | 0.566 | 0.215 | 7.98E-30 |
| Ostf1    | 3.79E-34 | 0.281088788 | 0.394 | 0.13  | 8.03E-30 |
| Zc3hav1  | 4.09E-34 | 0.281706328 | 0.359 | 0.112 | 8.66E-30 |
| B4galnt1 | 4.37E-34 | 0.281948496 | 0.388 | 0.125 | 9.27E-30 |
| Nedd4    | 4.57E-34 | 0.49389531  | 0.672 | 0.299 | 9.69E-30 |
| Sfpq     | 5.45E-34 | 0.338977934 | 0.481 | 0.174 | 1.16E-29 |
| M6pr     | 5.68E-34 | 0.28765868  | 0.422 | 0.142 | 1.20E-29 |
| Itih3    | 5.71E-34 | 0.652167752 | 0.872 | 0.545 | 1.21E-29 |
| Rbm5     | 6.37E-34 | 0.258056381 | 0.309 | 0.09  | 1.35E-29 |
| Cct5     | 6.59E-34 | 0.339026673 | 0.544 | 0.209 | 1.40E-29 |
| Tmbim4   | 7.25E-34 | 0.396160519 | 0.675 | 0.287 | 1.54E-29 |
| Slc22a18 | 1.03E-33 | 0.344702838 | 0.406 | 0.138 | 2.18E-29 |

|          |          |             |       |       |          |
|----------|----------|-------------|-------|-------|----------|
| Mgam     | 1.05E-33 | 0.252289372 | 0.35  | 0.108 | 2.22E-29 |
| Rnf139   | 1.05E-33 | 0.255095568 | 0.3   | 0.086 | 2.23E-29 |
| Ces2e    | 1.13E-33 | 0.541615406 | 0.559 | 0.234 | 2.40E-29 |
| Nipbl    | 1.15E-33 | 0.271581131 | 0.378 | 0.121 | 2.44E-29 |
| Zfand3   | 1.33E-33 | 0.254936374 | 0.403 | 0.133 | 2.81E-29 |
| Cct8     | 1.61E-33 | 0.27550315  | 0.584 | 0.226 | 3.42E-29 |
| Htatip2  | 1.80E-33 | 0.250790712 | 0.344 | 0.106 | 3.82E-29 |
| Snrpb    | 1.84E-33 | 0.338611401 | 0.466 | 0.17  | 3.90E-29 |
| Ddb1     | 2.08E-33 | 0.346066682 | 0.519 | 0.197 | 4.41E-29 |
| Eno1     | 2.08E-33 | 0.351145215 | 0.534 | 0.205 | 4.41E-29 |
| Jun      | 2.53E-33 | 0.462263556 | 0.522 | 0.207 | 5.36E-29 |
| Ubb      | 2.80E-33 | 0.457044516 | 0.863 | 0.53  | 5.93E-29 |
| G3bp1    | 3.34E-33 | 0.385822281 | 0.441 | 0.158 | 7.09E-29 |
| Stat1    | 3.94E-33 | 0.546735504 | 0.281 | 0.081 | 8.36E-29 |
| Psap     | 5.13E-33 | 0.623494905 | 0.731 | 0.372 | 1.09E-28 |
| Pglyrp2  | 5.44E-33 | 0.356611921 | 0.441 | 0.158 | 1.15E-28 |
| Tsn      | 6.84E-33 | 0.330298515 | 0.522 | 0.198 | 1.45E-28 |
| Jmjd1c   | 7.34E-33 | 0.27909483  | 0.394 | 0.13  | 1.56E-28 |
| Ssu72    | 9.92E-33 | 0.2719336   | 0.528 | 0.198 | 2.10E-28 |
| Nbeal1   | 1.14E-32 | 0.299538766 | 0.512 | 0.191 | 2.41E-28 |
| Scarb1   | 1.25E-32 | 0.313427375 | 0.428 | 0.149 | 2.65E-28 |
| Prdx1    | 1.92E-32 | 0.451719074 | 0.994 | 0.935 | 4.08E-28 |
| Arpc3    | 2.16E-32 | 0.251829815 | 0.522 | 0.197 | 4.59E-28 |
| Acaca    | 2.39E-32 | 0.284277788 | 0.338 | 0.106 | 5.07E-28 |
| Itih4    | 2.48E-32 | 0.641429044 | 0.944 | 0.694 | 5.26E-28 |
| Kmt2e    | 4.11E-32 | 0.274671969 | 0.428 | 0.149 | 8.71E-28 |
| Hmgcs1   | 5.15E-32 | 0.832564635 | 0.728 | 0.394 | 1.09E-27 |
| H2-T22   | 7.03E-32 | 0.256353531 | 0.431 | 0.151 | 1.49E-27 |
| Btg2     | 7.19E-32 | 0.522430927 | 0.531 | 0.222 | 1.52E-27 |
| HnrnpC   | 7.64E-32 | 0.308759829 | 0.575 | 0.228 | 1.62E-27 |
| Tmem208  | 7.97E-32 | 0.274005569 | 0.506 | 0.19  | 1.69E-27 |
| Tmed9    | 1.29E-31 | 0.321727326 | 0.497 | 0.188 | 2.73E-27 |
| Atxn10   | 1.35E-31 | 0.281474641 | 0.456 | 0.165 | 2.86E-27 |
| Txnrd1   | 1.41E-31 | 0.44878113  | 0.541 | 0.221 | 3.00E-27 |
| Rbbp7    | 1.58E-31 | 0.266147346 | 0.419 | 0.146 | 3.36E-27 |
| Ptpn11   | 1.66E-31 | 0.268272501 | 0.341 | 0.108 | 3.52E-27 |
| Rab11a   | 1.94E-31 | 0.397764491 | 0.581 | 0.239 | 4.12E-27 |
| Mdh2     | 2.04E-31 | 0.388348299 | 0.747 | 0.346 | 4.33E-27 |
| Kpnb1    | 2.06E-31 | 0.270085264 | 0.419 | 0.145 | 4.36E-27 |
| Laptm4a  | 2.06E-31 | 0.513060963 | 0.778 | 0.395 | 4.37E-27 |
| Hjurp    | 2.20E-31 | 0.270559777 | 0.306 | 0.093 | 4.66E-27 |
| Nono     | 2.29E-31 | 0.352967741 | 0.509 | 0.198 | 4.85E-27 |
| Zmpste24 | 2.53E-31 | 0.28370233  | 0.406 | 0.141 | 5.37E-27 |

|          |          |             |       |       |          |
|----------|----------|-------------|-------|-------|----------|
| Jund     | 2.55E-31 | 0.290379318 | 0.537 | 0.209 | 5.41E-27 |
| Dst      | 3.49E-31 | 0.341340596 | 0.4   | 0.141 | 7.39E-27 |
| Pcbp1    | 6.60E-31 | 0.521298177 | 0.772 | 0.406 | 1.40E-26 |
| Fgb      | 6.71E-31 | 0.579305953 | 1     | 0.972 | 1.42E-26 |
| Cfi      | 7.11E-31 | 0.55084552  | 0.916 | 0.61  | 1.51E-26 |
| Tpm3     | 8.45E-31 | 0.250085793 | 0.378 | 0.128 | 1.79E-26 |
| H2afz    | 1.00E-30 | 0.815709761 | 0.769 | 0.419 | 2.13E-26 |
| Abca3    | 1.13E-30 | 0.262501227 | 0.294 | 0.088 | 2.40E-26 |
| Dynlt3   | 1.23E-30 | 0.364230805 | 0.537 | 0.214 | 2.61E-26 |
| Cct2     | 1.29E-30 | 0.306155051 | 0.544 | 0.214 | 2.73E-26 |
| Rtn3     | 1.32E-30 | 0.30860054  | 0.522 | 0.203 | 2.79E-26 |
| Tpp1     | 1.44E-30 | 0.349549942 | 0.562 | 0.226 | 3.05E-26 |
| Gstm6    | 1.45E-30 | 0.306771881 | 0.506 | 0.194 | 3.07E-26 |
| Ywhaz    | 1.92E-30 | 0.4565247   | 0.641 | 0.286 | 4.07E-26 |
| Eif4ebp1 | 2.00E-30 | 0.305730502 | 0.497 | 0.191 | 4.24E-26 |
| Morf4l2  | 2.43E-30 | 0.311361909 | 0.584 | 0.236 | 5.16E-26 |
| Nudt4    | 2.48E-30 | 0.541539321 | 0.734 | 0.376 | 5.26E-26 |
| Commd3   | 2.59E-30 | 0.324986244 | 0.541 | 0.217 | 5.49E-26 |
| Capzb    | 3.24E-30 | 0.311142306 | 0.5   | 0.194 | 6.86E-26 |
| Arid1a   | 3.44E-30 | 0.250196389 | 0.338 | 0.109 | 7.30E-26 |
| Pla2g12b | 4.12E-30 | 0.253577098 | 0.381 | 0.131 | 8.74E-26 |
| Ctsa     | 4.74E-30 | 0.329910071 | 0.338 | 0.112 | 1.01E-25 |
| Pkp4     | 5.65E-30 | 0.266928741 | 0.397 | 0.139 | 1.20E-25 |
| Pabpc1   | 6.33E-30 | 0.595882585 | 0.803 | 0.461 | 1.34E-25 |
| Gtf2i    | 7.74E-30 | 0.263169164 | 0.362 | 0.122 | 1.64E-25 |
| Fdps     | 8.11E-30 | 0.393590096 | 0.572 | 0.241 | 1.72E-25 |
| Csrp2    | 8.47E-30 | 0.270971092 | 0.375 | 0.129 | 1.80E-25 |
| Larp4b   | 8.62E-30 | 0.47313324  | 0.706 | 0.339 | 1.83E-25 |
| Phf3     | 1.02E-29 | 0.263839288 | 0.359 | 0.121 | 2.15E-25 |
| Prosl    | 1.05E-29 | 0.266838839 | 0.362 | 0.123 | 2.22E-25 |
| Snrpe    | 1.09E-29 | 0.348885346 | 0.644 | 0.276 | 2.31E-25 |
| Cdkn1a   | 1.14E-29 | 0.331008912 | 0.475 | 0.181 | 2.41E-25 |
| Sdc1     | 1.98E-29 | 0.392225601 | 0.634 | 0.28  | 4.20E-25 |
| Cope     | 2.11E-29 | 0.250436975 | 0.537 | 0.213 | 4.47E-25 |
| Rbpms    | 3.21E-29 | 0.381208529 | 0.572 | 0.242 | 6.81E-25 |
| Gsta2    | 3.67E-29 | 0.267150458 | 0.291 | 0.09  | 7.77E-25 |
| Csnk2b   | 3.99E-29 | 0.253780383 | 0.491 | 0.19  | 8.45E-25 |
| Kng2     | 4.09E-29 | 0.464973745 | 0.641 | 0.295 | 8.66E-25 |
| Dhcr24   | 5.19E-29 | 0.59171938  | 0.834 | 0.49  | 1.10E-24 |
| Atp6v1e1 | 5.50E-29 | 0.306931403 | 0.588 | 0.244 | 1.17E-24 |
| Hsp90b1  | 5.55E-29 | 0.580755735 | 0.969 | 0.78  | 1.18E-24 |
| Cyp51    | 5.71E-29 | 0.450826547 | 0.525 | 0.221 | 1.21E-24 |
| Habp2    | 5.91E-29 | 0.289508329 | 0.428 | 0.158 | 1.25E-24 |



|               |          |             |       |       |          |
|---------------|----------|-------------|-------|-------|----------|
| Pzp           | 7.07E-29 | 0.574893315 | 0.919 | 0.664 | 1.50E-24 |
| F12           | 8.70E-29 | 0.552487242 | 0.694 | 0.36  | 1.84E-24 |
| Net1          | 9.31E-29 | 0.25142758  | 0.306 | 0.097 | 1.97E-24 |
| Cast          | 1.09E-28 | 0.258893164 | 0.384 | 0.134 | 2.31E-24 |
| Abcc3         | 1.22E-28 | 0.27771272  | 0.431 | 0.16  | 2.59E-24 |
| Ssb           | 1.35E-28 | 0.252809021 | 0.478 | 0.182 | 2.87E-24 |
| Eif3f         | 1.65E-28 | 0.366971952 | 0.591 | 0.259 | 3.50E-24 |
| Manf          | 2.08E-28 | 0.594398609 | 0.787 | 0.441 | 4.42E-24 |
| Emc7          | 2.22E-28 | 0.280576703 | 0.528 | 0.211 | 4.70E-24 |
| Qk            | 2.30E-28 | 0.323252004 | 0.525 | 0.212 | 4.87E-24 |
| Ifih1         | 2.36E-28 | 0.259442961 | 0.325 | 0.107 | 5.00E-24 |
| Pdia6         | 2.89E-28 | 0.545583959 | 0.822 | 0.477 | 6.14E-24 |
| Slc39a14      | 3.28E-28 | 0.325162076 | 0.553 | 0.229 | 6.94E-24 |
| Echdc2        | 3.55E-28 | 0.281291009 | 0.494 | 0.194 | 7.52E-24 |
| Tmem50a       | 3.58E-28 | 0.268153252 | 0.475 | 0.184 | 7.59E-24 |
| Pbrm1         | 3.64E-28 | 0.302763373 | 0.531 | 0.213 | 7.72E-24 |
| Gsk3b         | 4.05E-28 | 0.265247303 | 0.431 | 0.161 | 8.59E-24 |
| Qprt          | 4.29E-28 | 0.335757118 | 0.603 | 0.261 | 9.09E-24 |
| Pcyox1        | 5.27E-28 | 0.294371844 | 0.475 | 0.185 | 1.12E-23 |
| Tecr          | 5.53E-28 | 0.408206485 | 0.681 | 0.32  | 1.17E-23 |
| Aplp2         | 5.78E-28 | 0.512807302 | 0.791 | 0.445 | 1.22E-23 |
| Ncl           | 6.29E-28 | 0.269276225 | 0.559 | 0.231 | 1.33E-23 |
| Ldlr          | 6.37E-28 | 0.290312151 | 0.431 | 0.162 | 1.35E-23 |
| Xbp1          | 6.47E-28 | 0.475442195 | 0.759 | 0.391 | 1.37E-23 |
| Sdf2l1        | 1.36E-27 | 0.293754448 | 0.444 | 0.171 | 2.89E-23 |
| Arpp19        | 1.53E-27 | 0.357064504 | 0.625 | 0.283 | 3.24E-23 |
| Clptm1l       | 1.91E-27 | 0.259583853 | 0.431 | 0.162 | 4.05E-23 |
| Znrf2         | 3.13E-27 | 0.268887185 | 0.519 | 0.209 | 6.64E-23 |
| Srsf3         | 3.70E-27 | 0.264513913 | 0.494 | 0.196 | 7.84E-23 |
| Calr          | 3.73E-27 | 0.549562635 | 0.966 | 0.778 | 7.90E-23 |
| Ssbp3         | 3.86E-27 | 0.292252491 | 0.409 | 0.153 | 8.19E-23 |
| Rps4x         | 4.54E-27 | 0.506948936 | 0.972 | 0.799 | 9.63E-23 |
| Nampt         | 6.20E-27 | 0.269757688 | 0.45  | 0.174 | 1.32E-22 |
| Pnp           | 6.92E-27 | 0.390243671 | 0.656 | 0.296 | 1.47E-22 |
| Mlec          | 7.23E-27 | 0.276388607 | 0.416 | 0.158 | 1.53E-22 |
| 9530068E07Rik | 7.29E-27 | 0.30387292  | 0.525 | 0.22  | 1.55E-22 |
| Rarres2       | 8.21E-27 | 0.514767519 | 0.928 | 0.681 | 1.74E-22 |
| C1s1          | 1.08E-26 | 0.442807487 | 0.803 | 0.431 | 2.28E-22 |
| Cpne3         | 1.12E-26 | 0.352189191 | 0.637 | 0.286 | 2.38E-22 |
| Psma6         | 1.14E-26 | 0.294418644 | 0.669 | 0.303 | 2.42E-22 |
| Son           | 1.22E-26 | 0.335114091 | 0.588 | 0.258 | 2.59E-22 |
| Atpl1a1       | 1.24E-26 | 0.295356649 | 0.522 | 0.213 | 2.62E-22 |
| Etf1          | 1.31E-26 | 0.280156947 | 0.5   | 0.2   | 2.78E-22 |

|          |          |             |       |       |          |
|----------|----------|-------------|-------|-------|----------|
| Irgm1    | 1.50E-26 | 0.545209523 | 0.312 | 0.109 | 3.19E-22 |
| Grina    | 2.27E-26 | 0.324275102 | 0.478 | 0.195 | 4.81E-22 |
| H2afy    | 2.99E-26 | 0.263729139 | 0.5   | 0.203 | 6.33E-22 |
| Set      | 4.24E-26 | 0.379011493 | 0.669 | 0.317 | 9.00E-22 |
| Cdk2ap2  | 4.63E-26 | 0.289519138 | 0.522 | 0.22  | 9.81E-22 |
| H2-T23   | 4.66E-26 | 0.276939457 | 0.444 | 0.175 | 9.88E-22 |
| Ctsb     | 1.22E-25 | 0.482520824 | 0.856 | 0.509 | 2.58E-21 |
| Fabp5    | 1.29E-25 | 0.391819987 | 0.588 | 0.264 | 2.73E-21 |
| Selenok  | 1.60E-25 | 0.433507766 | 0.741 | 0.399 | 3.39E-21 |
| H2afv    | 1.70E-25 | 0.289746216 | 0.556 | 0.239 | 3.61E-21 |
| Idi1     | 1.98E-25 | 0.420254235 | 0.578 | 0.265 | 4.19E-21 |
| Nckap1   | 2.59E-25 | 0.265004215 | 0.456 | 0.182 | 5.49E-21 |
| Gdf15    | 2.82E-25 | 0.333109424 | 0.297 | 0.102 | 5.98E-21 |
| Eef1g    | 3.02E-25 | 0.316655071 | 0.656 | 0.304 | 6.40E-21 |
| Apoa4    | 3.04E-25 | 0.485599191 | 0.503 | 0.213 | 6.45E-21 |
| Atp6v0b  | 3.52E-25 | 0.3281834   | 0.556 | 0.249 | 7.46E-21 |
| Bhlhe40  | 3.77E-25 | 0.292807131 | 0.584 | 0.257 | 8.00E-21 |
| Psmal1   | 3.90E-25 | 0.323986037 | 0.65  | 0.302 | 8.27E-21 |
| Stat3    | 4.03E-25 | 0.254969112 | 0.438 | 0.172 | 8.54E-21 |
| Bst2     | 4.13E-25 | 0.477623567 | 0.772 | 0.442 | 8.76E-21 |
| Cbr1     | 5.37E-25 | 0.272513133 | 0.472 | 0.192 | 1.14E-20 |
| Oste     | 7.32E-25 | 0.338895903 | 0.603 | 0.279 | 1.55E-20 |
| Rnf130   | 8.93E-25 | 0.273503271 | 0.412 | 0.162 | 1.89E-20 |
| Rbx1     | 1.24E-24 | 0.315255474 | 0.637 | 0.3   | 2.63E-20 |
| Ctsh     | 1.66E-24 | 0.415286619 | 0.738 | 0.369 | 3.52E-20 |
| Klhl24   | 1.74E-24 | 0.262349082 | 0.522 | 0.222 | 3.68E-20 |
| Arhgef12 | 2.07E-24 | 0.282546777 | 0.528 | 0.228 | 4.39E-20 |
| F2       | 2.66E-24 | 0.466086528 | 0.953 | 0.754 | 5.63E-20 |
| Apoh     | 2.92E-24 | 0.388318616 | 0.978 | 0.911 | 6.19E-20 |
| Rpn1     | 2.92E-24 | 0.37822827  | 0.688 | 0.339 | 6.20E-20 |
| Ctsd     | 3.10E-24 | 0.334325225 | 0.681 | 0.326 | 6.57E-20 |
| Ddah1    | 3.67E-24 | 0.42403604  | 0.672 | 0.331 | 7.79E-20 |
| Clta     | 4.25E-24 | 0.338209515 | 0.669 | 0.328 | 9.00E-20 |
| Tcp1     | 4.47E-24 | 0.265513666 | 0.534 | 0.234 | 9.47E-20 |
| Pter     | 8.33E-24 | 0.346644816 | 0.547 | 0.246 | 1.77E-19 |
| Sumo2    | 2.34E-23 | 0.373648741 | 0.684 | 0.351 | 4.97E-19 |
| Hpn      | 3.18E-23 | 0.395617256 | 0.706 | 0.372 | 6.75E-19 |
| H3f3b    | 3.52E-23 | 0.466864178 | 0.912 | 0.675 | 7.47E-19 |
| Lpgat1   | 3.85E-23 | 0.36742834  | 0.759 | 0.388 | 8.17E-19 |
| Nr2f6    | 4.40E-23 | 0.26536372  | 0.55  | 0.245 | 9.33E-19 |
| Hmgcr    | 1.14E-22 | 0.401085757 | 0.409 | 0.169 | 2.42E-18 |
| Tmed10   | 2.37E-22 | 0.383316083 | 0.741 | 0.399 | 5.02E-18 |
| Gstm2    | 4.28E-22 | 0.272534996 | 0.284 | 0.101 | 9.07E-18 |

|           |          |             |       |       |          |
|-----------|----------|-------------|-------|-------|----------|
| Kif1b     | 5.31E-22 | 0.276266447 | 0.522 | 0.236 | 1.12E-17 |
| Prox1     | 5.97E-22 | 0.333670415 | 0.556 | 0.263 | 1.27E-17 |
| Cd81      | 6.31E-22 | 0.510842804 | 0.863 | 0.575 | 1.34E-17 |
| Hnrnpu    | 6.47E-22 | 0.335897576 | 0.691 | 0.352 | 1.37E-17 |
| Npm1      | 9.64E-22 | 0.456339738 | 0.787 | 0.481 | 2.04E-17 |
| Ywhaq     | 1.03E-21 | 0.269809244 | 0.55  | 0.255 | 2.19E-17 |
| Slc6a13   | 1.47E-21 | 0.282952281 | 0.572 | 0.266 | 3.12E-17 |
| Prdx2     | 2.01E-21 | 0.377681366 | 0.7   | 0.389 | 4.26E-17 |
| Lamp1     | 2.57E-21 | 0.468347948 | 0.919 | 0.687 | 5.45E-17 |
| Osgin1    | 2.83E-21 | 0.286033164 | 0.444 | 0.193 | 5.99E-17 |
| Rrbp1     | 3.01E-21 | 0.447205029 | 0.769 | 0.448 | 6.39E-17 |
| Rpl5      | 5.08E-21 | 0.489706844 | 0.8   | 0.54  | 1.08E-16 |
| Zfand5    | 5.53E-21 | 0.257161987 | 0.503 | 0.228 | 1.17E-16 |
| Rpl7      | 6.73E-21 | 0.451847351 | 0.922 | 0.729 | 1.43E-16 |
| Eif4a1    | 7.23E-21 | 0.394445341 | 0.784 | 0.465 | 1.53E-16 |
| Arf1      | 8.42E-21 | 0.406887578 | 0.659 | 0.354 | 1.79E-16 |
| Dad1      | 1.56E-20 | 0.355051585 | 0.756 | 0.418 | 3.30E-16 |
| Mtdh      | 2.02E-20 | 0.268989226 | 0.562 | 0.265 | 4.27E-16 |
| Dstn      | 3.54E-20 | 0.415759764 | 0.731 | 0.421 | 7.51E-16 |
| Atp6v1g1  | 4.96E-20 | 0.311609552 | 0.706 | 0.383 | 1.05E-15 |
| Spcs2     | 5.38E-20 | 0.37483101  | 0.731 | 0.417 | 1.14E-15 |
| Pfn1      | 7.83E-20 | 0.379629393 | 0.853 | 0.557 | 1.66E-15 |
| Hnrnpab   | 7.99E-20 | 0.258363865 | 0.581 | 0.279 | 1.69E-15 |
| Ran       | 9.63E-20 | 0.417178169 | 0.703 | 0.39  | 2.04E-15 |
| Id2       | 1.09E-19 | 0.4603996   | 0.725 | 0.415 | 2.31E-15 |
| Rora      | 1.47E-19 | 0.321402556 | 0.634 | 0.33  | 3.12E-15 |
| Fgg       | 2.01E-19 | 0.472831624 | 1     | 0.97  | 4.26E-15 |
| Hdgf      | 2.25E-19 | 0.258855073 | 0.662 | 0.332 | 4.77E-15 |
| Atxn713b  | 2.66E-19 | 0.304730607 | 0.631 | 0.318 | 5.63E-15 |
| Pdia4     | 3.16E-19 | 0.295904926 | 0.644 | 0.322 | 6.70E-15 |
| Tkfc      | 3.52E-19 | 0.286593311 | 0.619 | 0.312 | 7.45E-15 |
| Sec61a1   | 3.66E-19 | 0.271617962 | 0.531 | 0.251 | 7.75E-15 |
| Mrfap1    | 6.19E-19 | 0.258253225 | 0.691 | 0.361 | 1.31E-14 |
| Sh3bgr1   | 8.73E-19 | 0.268484054 | 0.653 | 0.33  | 1.85E-14 |
| Fads1     | 1.12E-18 | 0.302933943 | 0.713 | 0.373 | 2.37E-14 |
| Btf3      | 1.13E-18 | 0.399705373 | 0.816 | 0.551 | 2.39E-14 |
| H3f3a     | 1.48E-18 | 0.37639386  | 0.906 | 0.667 | 3.13E-14 |
| Ndufb6    | 1.48E-18 | 0.280523086 | 0.75  | 0.407 | 3.14E-14 |
| Cald1     | 1.57E-18 | 0.388713422 | 0.875 | 0.57  | 3.32E-14 |
| Mbl1      | 2.44E-18 | 0.275259026 | 0.787 | 0.427 | 5.17E-14 |
| Tmbim6    | 3.00E-18 | 0.392263923 | 0.947 | 0.749 | 6.35E-14 |
| Tor1aip2  | 3.54E-18 | 0.284893844 | 0.484 | 0.231 | 7.50E-14 |
| Hnrnpa2b1 | 4.38E-18 | 0.397314221 | 0.841 | 0.545 | 9.29E-14 |

|           |          |             |       |       |          |
|-----------|----------|-------------|-------|-------|----------|
| Elob      | 5.61E-18 | 0.275839021 | 0.816 | 0.464 | 1.19E-13 |
| Entpd5    | 6.39E-18 | 0.252861764 | 0.484 | 0.228 | 1.36E-13 |
| Tpi1      | 6.86E-18 | 0.30962483  | 0.762 | 0.427 | 1.46E-13 |
| Dbi       | 7.46E-18 | 0.278916315 | 0.997 | 0.967 | 1.58E-13 |
| Surf4     | 1.31E-17 | 0.304947801 | 0.609 | 0.318 | 2.77E-13 |
| Aldh1a7   | 1.47E-17 | 0.2982854   | 0.669 | 0.355 | 3.11E-13 |
| Rnf11     | 2.11E-17 | 0.2607517   | 0.644 | 0.337 | 4.48E-13 |
| Trp53inp1 | 2.96E-17 | 0.367881629 | 0.566 | 0.293 | 6.28E-13 |
| Agpat2    | 3.12E-17 | 0.308822209 | 0.8   | 0.472 | 6.62E-13 |
| Akr1a1    | 3.60E-17 | 0.307175755 | 0.784 | 0.495 | 7.63E-13 |
| Lbp       | 3.66E-17 | 0.254199332 | 0.431 | 0.2   | 7.76E-13 |
| Lipa      | 6.22E-17 | 0.343216994 | 0.728 | 0.409 | 1.32E-12 |
| C4b       | 8.68E-17 | 0.366525121 | 0.853 | 0.552 | 1.84E-12 |
| Creg1     | 1.05E-16 | 0.453832838 | 0.853 | 0.579 | 2.22E-12 |
| Ptp4a2    | 1.13E-16 | 0.281392298 | 0.659 | 0.356 | 2.39E-12 |
| Rpn2      | 1.30E-16 | 0.2920571   | 0.581 | 0.296 | 2.75E-12 |
| Rpsa      | 1.34E-16 | 0.351790561 | 0.966 | 0.829 | 2.84E-12 |
| Sppl2a    | 1.49E-16 | 0.317183247 | 0.772 | 0.445 | 3.17E-12 |
| Itm2b     | 1.67E-16 | 0.301921227 | 0.991 | 0.909 | 3.55E-12 |
| Rplp0     | 1.87E-16 | 0.359705939 | 0.922 | 0.74  | 3.97E-12 |
| Selenos   | 2.20E-16 | 0.285601437 | 0.566 | 0.296 | 4.66E-12 |
| Ldha      | 2.30E-16 | 0.408776025 | 0.909 | 0.678 | 4.88E-12 |
| Tmem59    | 2.52E-16 | 0.316849818 | 0.775 | 0.451 | 5.35E-12 |
| Hspa5     | 2.69E-16 | 0.42994662  | 0.941 | 0.759 | 5.69E-12 |
| Acsl5     | 3.04E-16 | 0.278855991 | 0.584 | 0.305 | 6.45E-12 |
| Tbca      | 3.52E-16 | 0.32263173  | 0.825 | 0.512 | 7.46E-12 |
| Bsg       | 4.60E-16 | 0.367447779 | 0.816 | 0.539 | 9.76E-12 |
| Agt       | 4.62E-16 | 0.391749486 | 0.8   | 0.499 | 9.80E-12 |
| Rpl15     | 4.79E-16 | 0.374290947 | 0.916 | 0.753 | 1.01E-11 |
| Plin2     | 1.39E-15 | 0.280001614 | 0.809 | 0.496 | 2.94E-11 |
| Ddx5      | 1.94E-15 | 0.332137278 | 0.856 | 0.567 | 4.11E-11 |
| Vmp1      | 2.72E-15 | 0.273125245 | 0.709 | 0.393 | 5.77E-11 |
| Ppib      | 6.33E-15 | 0.309015515 | 0.834 | 0.532 | 1.34E-10 |
| Rps3      | 1.32E-14 | 0.32715143  | 0.878 | 0.659 | 2.80E-10 |
| Mif       | 1.33E-14 | 0.283443331 | 0.838 | 0.542 | 2.82E-10 |
| Serpinf2  | 1.69E-14 | 0.319198733 | 0.856 | 0.548 | 3.58E-10 |
| Eef1b2    | 2.06E-14 | 0.328366148 | 0.809 | 0.536 | 4.37E-10 |
| Hnrnpa3   | 2.73E-14 | 0.266355128 | 0.684 | 0.392 | 5.79E-10 |
| Gpt2      | 3.25E-14 | 0.302098714 | 0.794 | 0.483 | 6.90E-10 |
| Iigp1     | 4.29E-14 | 0.64245753  | 0.922 | 0.638 | 9.09E-10 |
| Naca      | 7.18E-14 | 0.291634054 | 0.856 | 0.667 | 1.52E-09 |
| Ndufc2    | 9.11E-14 | 0.279356533 | 0.809 | 0.503 | 1.93E-09 |
| Aadac     | 1.61E-13 | 0.313821232 | 0.816 | 0.528 | 3.42E-09 |

|          |          |             |       |       |             |
|----------|----------|-------------|-------|-------|-------------|
| Pcbp2    | 2.36E-13 | 0.296198036 | 0.809 | 0.527 | 4.99E-09    |
| Rpl6     | 3.10E-13 | 0.305347556 | 0.881 | 0.694 | 6.58E-09    |
| Serpind1 | 5.38E-13 | 0.252586875 | 0.762 | 0.465 | 1.14E-08    |
| Canx     | 6.63E-13 | 0.287991658 | 0.922 | 0.662 | 1.41E-08    |
| Rpl10a   | 8.70E-13 | 0.314822207 | 0.925 | 0.759 | 1.84E-08    |
| Rack1    | 1.04E-12 | 0.295993535 | 0.881 | 0.653 | 2.21E-08    |
| Neat1    | 1.67E-12 | 0.321464764 | 0.884 | 0.622 | 3.55E-08    |
| Calm1    | 1.80E-12 | 0.267884005 | 0.812 | 0.539 | 3.82E-08    |
| Rps27a   | 1.86E-12 | 0.2548295   | 0.981 | 0.915 | 3.95E-08    |
| Dnaja1   | 2.78E-12 | 0.267444973 | 0.831 | 0.558 | 5.89E-08    |
| Apom     | 2.93E-12 | 0.307378715 | 0.856 | 0.596 | 6.21E-08    |
| S100a10  | 3.58E-12 | 0.301880922 | 0.734 | 0.466 | 7.58E-08    |
| Sc5d     | 7.95E-12 | 0.312012581 | 0.809 | 0.543 | 1.69E-07    |
| C8a      | 8.03E-12 | 0.310993159 | 0.881 | 0.61  | 1.70E-07    |
| Eef2     | 8.27E-12 | 0.36620411  | 0.897 | 0.72  | 1.75E-07    |
| Sult1a1  | 2.66E-11 | 0.261214993 | 0.672 | 0.425 | 5.64E-07    |
| Zfp361l  | 6.05E-11 | 0.284073079 | 0.841 | 0.589 | 1.28E-06    |
| Arl6ip1  | 2.58E-10 | 0.331769333 | 0.769 | 0.488 | 5.47E-06    |
| Orm1     | 4.07E-10 | 0.498447146 | 0.963 | 0.946 | 8.63E-06    |
| Apof     | 4.15E-10 | 0.28293409  | 0.878 | 0.67  | 8.79E-06    |
| Ces1g    | 1.20E-09 | 0.323883701 | 0.681 | 0.456 | 2.54E-05    |
| Rps16    | 4.04E-09 | 0.265889953 | 0.953 | 0.863 | 8.55E-05    |
| Gclc     | 1.71E-07 | 0.293582322 | 0.828 | 0.574 | 0.003618095 |

---

**Table S4** KEGG enrichment analysis of cluster 7's DEGs

| Description                                     | GeneRatio | BgRatio  | pvalue   | p.adjust | qvalue   | Count |
|-------------------------------------------------|-----------|----------|----------|----------|----------|-------|
| Complement and coagulation cascades             | 22/438    | 93/8912  | 4.59E-10 | 1.37E-07 | 9.80E-08 | 22    |
| Phagosome                                       | 31/438    | 182/8912 | 9.25E-10 | 1.38E-07 | 9.88E-08 | 31    |
| Ferroptosis                                     | 14/438    | 40/8912  | 2.80E-09 | 2.79E-07 | 1.99E-07 | 14    |
| Protein processing in endoplasmic reticulum     | 28/438    | 172/8912 | 1.73E-08 | 1.30E-06 | 9.26E-07 | 28    |
| Fluid shear stress and atherosclerosis          | 25/438    | 148/8912 | 4.85E-08 | 2.90E-06 | 2.07E-06 | 25    |
| Salmonella infection                            | 33/438    | 253/8912 | 2.34E-07 | 1.17E-05 | 8.34E-06 | 33    |
| Antigen processing and presentation             | 18/438    | 90/8912  | 2.82E-07 | 1.20E-05 | 8.61E-06 | 18    |
| Lysosome                                        | 22/438    | 131/8912 | 3.47E-07 | 1.30E-05 | 9.28E-06 | 22    |
| Coronavirus disease - COVID-19                  | 32/438    | 247/8912 | 4.19E-07 | 1.39E-05 | 9.95E-06 | 32    |
| Human cytomegalovirus infection                 | 31/438    | 256/8912 | 2.77E-06 | 8.27E-05 | 5.91E-05 | 31    |
| Pertussis                                       | 15/438    | 77/8912  | 3.94E-06 | 0.000107 | 7.66E-05 | 15    |
| Kaposi sarcoma-associated herpesvirus infection | 27/438    | 224/8912 | 1.34E-05 | 0.000333 | 0.000238 | 27    |
| Steroid biosynthesis                            | 7/438     | 20/8912  | 2.93E-05 | 0.000674 | 0.000481 | 7     |
| Adherens junction                               | 13/438    | 71/8912  | 3.49E-05 | 0.000744 | 0.000532 | 13    |
| Glutathione metabolism                          | 13/438    | 72/8912  | 4.07E-05 | 0.000811 | 0.000579 | 13    |
| Lipid and atherosclerosis                       | 25/438    | 216/8912 | 5.54E-05 | 0.001035 | 0.00074  | 25    |
| Terpenoid backbone biosynthesis                 | 7/438     | 23/8912  | 8.14E-05 | 0.001432 | 0.001024 | 7     |
| Cholesterol metabolism                          | 10/438    | 49/8912  | 0.000108 | 0.001761 | 0.001258 | 10    |
| Apoptosis                                       | 18/438    | 136/8912 | 0.000112 | 0.001761 | 0.001258 | 18    |
| Platinum drug resistance                        | 13/438    | 80/8912  | 0.000126 | 0.001888 | 0.001349 | 13    |
| Metabolism of xenobiotics by cytochrome P450    | 12/438    | 73/8912  | 0.000204 | 0.002908 | 0.002078 | 12    |
| Spliceosome                                     | 17/438    | 134/8912 | 0.000289 | 0.003851 | 0.002752 | 17    |
| Toxoplasmosis                                   | 15/438    | 110/8912 | 0.000296 | 0.003851 | 0.002752 | 15    |
| Hepatocellular carcinoma                        | 20/438    | 174/8912 | 0.000334 | 0.00398  | 0.002844 | 20    |
| Arrhythmogenic right ventricular cardiomyopathy | 12/438    | 77/8912  | 0.000342 | 0.00398  | 0.002844 | 12    |
| Thyroid cancer                                  | 8/438     | 37/8912  | 0.00035  | 0.00398  | 0.002844 | 8     |
| Viral carcinogenesis                            | 24/438    | 229/8912 | 0.000359 | 0.00398  | 0.002844 | 24    |
| Human papillomavirus infection                  | 33/438    | 362/8912 | 0.000424 | 0.00453  | 0.003237 | 33    |
| Hepatitis C                                     | 19/438    | 165/8912 | 0.000457 | 0.004612 | 0.003296 | 19    |
| Human T-cell leukemia virus 1 infection         | 25/438    | 247/8912 | 0.000463 | 0.004612 | 0.003296 | 25    |
| Regulation of actin cytoskeleton                | 23/438    | 220/8912 | 0.000491 | 0.00474  | 0.003387 | 23    |
| Tight junction                                  | 19/438    | 167/8912 | 0.000531 | 0.004965 | 0.003549 | 19    |
| Leishmaniasis                                   | 11/438    | 70/8912  | 0.000557 | 0.00505  | 0.003609 | 11    |
| Human immunodeficiency virus 1 infection        | 24/438    | 240/8912 | 0.000712 | 0.006258 | 0.004472 | 24    |
| Chemical carcinogenesis - DNA adducts           | 12/438    | 84/8912  | 0.00077  | 0.006575 | 0.004699 | 12    |
| Bacterial invasion of epithelial cells          | 11/438    | 76/8912  | 0.001132 | 0.009146 | 0.006537 | 11    |
| Pancreatic cancer                               | 11/438    | 76/8912  | 0.001132 | 0.009146 | 0.006537 | 11    |
| Parkinson disease                               | 25/438    | 264/8912 | 0.001222 | 0.009619 | 0.006874 | 25    |

|                                                      |        |          |          |          |          |    |
|------------------------------------------------------|--------|----------|----------|----------|----------|----|
| AGE-RAGE signaling pathway in diabetic complications | 13/438 | 101/8912 | 0.00128  | 0.009815 | 0.007014 | 13 |
| Tuberculosis                                         | 19/438 | 180/8912 | 0.001327 | 0.009917 | 0.007088 | 19 |
| Chemical carcinogenesis - receptor activation        | 22/438 | 225/8912 | 0.001571 | 0.011458 | 0.008189 | 22 |
| Fatty acid biosynthesis                              | 5/438  | 19/8912  | 0.001837 | 0.012868 | 0.009196 | 5  |
| Proteasome                                           | 8/438  | 47/8912  | 0.001851 | 0.012868 | 0.009196 | 8  |
| Epstein-Barr virus infection                         | 22/438 | 231/8912 | 0.002196 | 0.014923 | 0.010665 | 22 |
| Drug metabolism - cytochrome P450                    | 10/438 | 71/8912  | 0.002317 | 0.015392 | 0.011    | 10 |
| Neurotrophin signaling pathway                       | 14/438 | 121/8912 | 0.002381 | 0.015474 | 0.011059 | 14 |
| Proteoglycans in cancer                              | 20/438 | 205/8912 | 0.002593 | 0.016495 | 0.011788 | 20 |
| Fatty acid metabolism                                | 9/438  | 62/8912  | 0.003072 | 0.019134 | 0.013674 | 9  |
| Prion disease                                        | 24/438 | 268/8912 | 0.003192 | 0.019476 | 0.013918 | 24 |
| Bile secretion                                       | 12/438 | 100/8912 | 0.003524 | 0.021075 | 0.015062 | 12 |
| ECM-receptor interaction                             | 11/438 | 88/8912  | 0.003731 | 0.021876 | 0.015634 | 11 |
| Cellular senescence                                  | 18/438 | 184/8912 | 0.004046 | 0.023265 | 0.016627 | 18 |
| Amyotrophic lateral sclerosis                        | 30/438 | 369/8912 | 0.004473 | 0.025236 | 0.018035 | 30 |
| Hypertrophic cardiomyopathy                          | 11/438 | 91/8912  | 0.004837 | 0.026785 | 0.019142 | 11 |
| Leukocyte transendothelial migration                 | 13/438 | 118/8912 | 0.005131 | 0.027894 | 0.019935 | 13 |
| Drug metabolism - other enzymes                      | 11/438 | 92/8912  | 0.005259 | 0.028079 | 0.020067 | 11 |
| Small cell lung cancer                               | 11/438 | 93/8912  | 0.005709 | 0.029947 | 0.021402 | 11 |
| Dilated cardiomyopathy                               | 11/438 | 94/8912  | 0.006189 | 0.031798 | 0.022725 | 11 |
| Hepatitis B                                          | 16/438 | 163/8912 | 0.006325 | 0.031798 | 0.022725 | 16 |
| Chemical carcinogenesis - reactive oxygen species    | 20/438 | 222/8912 | 0.006381 | 0.031798 | 0.022725 | 20 |
| Endometrial cancer                                   | 8/438  | 58/8912  | 0.007047 | 0.034544 | 0.024688 | 8  |
| Alzheimer disease                                    | 30/438 | 383/8912 | 0.007548 | 0.036398 | 0.026013 | 30 |
| Legionellosis                                        | 8/438  | 61/8912  | 0.00953  | 0.045229 | 0.032324 | 8  |
| Focal adhesion                                       | 18/438 | 201/8912 | 0.009968 | 0.046038 | 0.032902 | 18 |
| HIF-1 signaling pathway                              | 12/438 | 114/8912 | 0.010008 | 0.046038 | 0.032902 | 12 |
| PI3K-Akt signaling pathway                           | 28/438 | 359/8912 | 0.010222 | 0.046309 | 0.033095 | 28 |
| Viral myocarditis                                    | 10/438 | 88/8912  | 0.010814 | 0.048259 | 0.034489 | 10 |

### **Supplementary reference**

1. Koo JH, Lee HJ, Kim W, Kim SG. Endoplasmic Reticulum Stress in Hepatic Stellate Cells Promotes Liver Fibrosis via PERK-Mediated Degradation of HNRNPA1 and Up-regulation of SMAD2. *Gastroenterology*. 2016 Jan;150(1):181-93 e8.
